1 Title:

2 The partial duplication of an E3-ligase gene in *Triticeae*  
3 species mediates resistance to powdery mildew fungi

4

5 Jeyaraman Rajaraman<sup>1</sup>, Dimitar Douchkov<sup>1</sup>, Stefanie Lück<sup>1</sup>, Götz Hensel<sup>1</sup>, Daniela  
6 Nowara<sup>1</sup>, Maria Pogoda<sup>1</sup>, Twan Rutten<sup>1</sup>, Tobias Meitzel<sup>1</sup>, Caroline Höfle<sup>2</sup>, Ralph  
7 Hückelhoven<sup>2</sup>, Jörn Klinkenberg<sup>3</sup>, Marco Trujillo<sup>3</sup>, Eva Bauer<sup>4</sup>, Thomas Schmutzer<sup>1</sup>,  
8 Axel Himmelbach<sup>1</sup>, Martin Mascher<sup>1</sup>, Barbara Lazzari<sup>5</sup>, Nils Stein<sup>1</sup>, Jochen Kumlehn<sup>1</sup>,  
9 and Patrick Schweizer<sup>1§</sup>

10

11 <sup>1</sup>Leibniz Institut für Pflanzengenetik und Kulturpflanzenforschung (IPK Gatersleben),  
12 Corrensstrasse 3, D-06466 Stadt Seeland, Germany

13 <sup>2</sup>Technische Universität München, Emil-Ramann-Straße 2, D-85354 Freising,  
14 Germany

15 <sup>3</sup>Leibniz Institut für Pflanzenbiochemie, Weinberg 3, D-06120 Halle (Saale), Germany

16 <sup>4</sup>Technische Universität München, Liesel-Beckmann-Straße 2, D-85354 Freising,  
17 Germany

18 <sup>5</sup>Parco Tecnologico Padano, Via Einstein, Loc. Cascina Codazza, 26900, Lodi, Italy

19

20

21 §Corresponding author: Leibniz Institut für Pflanzengenetik und  
22 Kulturpflanzenforschung (IPK Gatersleben), Corrensstrasse 3, 06466 Stadt Seeland,  
23 Germany, [schweiz@ipk-gatersleben.de](mailto:schweiz@ipk-gatersleben.de)

24

25 Running Title: Partial gene duplicate for pathogen resistance

26 **ABSTRACT**

27

28 In plant-pathogen interactions, components of the plant ubiquitination machinery are  
29 preferred targets of pathogen-encoded effectors suppressing defense responses or co-opting  
30 host cellular functions for accommodation. Here, we employed transient and stable gene  
31 silencing- and over-expression systems in *Hordeum vulgare* (barley) to study the function of  
32 *HvARM1* (for *H. vulgare Armadillo 1*), a partial gene duplicate of the U-box/armadillo-repeat  
33 E3 ligase *HvPUB15* (for *H. vulgare Plant U-Box 15*). The partial *ARM1* gene was derived  
34 from an ancient gene-duplication event in a common ancestor of the *Triticeae* tribe of  
35 grasses comprising the major crop species *H. vulgare*, *Triticum aestivum* and *Secale*  
36 *cereale*. The barley gene *HvARM1* contributed to quantitative host as well as nonhost  
37 resistance to the biotrophic powdery mildew fungus *Blumeria graminis*, and allelic variants  
38 were found to be associated with powdery mildew-disease severity. Both *HvPUB15* and  
39 *HvARM1* proteins interacted in yeast and plant cells with the susceptibility-related, plastid-  
40 localized barley homologs of THF1 (for Thylakoid formation 1) and of ClpS1 (for Clp-protease  
41 adaptor S1) of *Arabidopsis thaliana*. The results suggest a neo-functionalization *HvARM1* to  
42 increase resistance against powdery mildew and provide a link to plastid function in  
43 susceptibility to biotrophic pathogen attack.

44

45 **KEYWORDS**

46 *Hordeum vulgare*

47 *Blumeria graminis*

48 *Triticeae*

49 *Plant U-box protein*

50 *Armadillo-repeat*

51 *Partial gene duplication*

52

## 53 INTRODUCTION

54

55 Plants response to pathogen attack by the activation of their innate-immunity system, which  
56 is triggered by the perception of pathogen-associated molecular patterns (PAMPs). On the  
57 other hand, successful plant pathogens manipulate their hosts by complex arsenals of  
58 secreted effector proteins to co-opt cellular host functions for accommodation, nutritional  
59 exploitation, or for suppression of immunity. A growing number of these were found to target  
60 components of the plant ubiquitination machinery including plant U-box E3 ligases (PUB's)  
61 (Abramovitch *et al.*, 2006, Angot *et al.*, 2006, Bos *et al.*, 2010, Groll *et al.*, 2008, Nomura *et*  
62 *al.*, 2011, Rosebrock *et al.*, 2007, Spallek *et al.*, 2009). The covalent attachment of single  
63 ubiquitin moieties or polyubiquitin chains to lysine residues of eukaryotic protein substrates  
64 can have diverse effects on their fate. Ubiquitination most commonly results in the  
65 recognition and degradation of tagged proteins by the 26S proteasome but also mediates  
66 endosomal sorting into cellular compartments such as the lysosome or the plant vacuole, or  
67 contributes to DNA damage responses (Trujillo & Shirasu, 2010, Vierstra, 2009). The  
68 substrate specificity during ubiquitination is determined by the E3 ubiquitin ligases which can  
69 be sub-divided into three categories namely HECT, RING/U-box type, and cullin-RING  
70 ligases. These proteins mediate ubiquitin ligation in concert with the highly conserved  
71 ubiquitin-activating enzyme (E1) and ubiquitin-conjugating enzymes (E2). Due to their central  
72 cellular function, components of the ubiquitination system represent central cellular hubs of  
73 protein regulation involved in all aspects of plant life. As such, beneficial or parasitic  
74 organisms may utilize the ubiquitination machinery (Spallek *et al.*, 2009) to establish  
75 susceptible interactions. On the other hand higher plants exploit ubiquitin-mediated  
76 degradation of negative protein regulators of stress-hormone signaling for the initiation of  
77 PAMP-triggered immunity (PTI) that appears often to underlie quantitative host resistance  
78 (QR) or nonhost resistance (NHR) (Sadanandom *et al.*, 2012, Schweizer, 2007, Trujillo &  
79 Shirasu, 2010).

80 NHR protects plants from the vast majority of attacks by pathogens that have adapted  
81 during co-evolution to different, more or less closely-related plant species (Schulze-Lefert &  
82 Panstruga, 2011). Another broadly acting form of resistance against pathogens is QR, which  
83 is usually determined by several QTL, as revealed by crossing more resistant genotypes with  
84 susceptible ones, and is generally looked upon as a manifestation of PTI. In contrast to ETI  
85 it does not confer complete protection but may be more durable in the field. Cultivated barley  
86 (*Hordeum vulgare* ssp. *vulgare*) is a nonhost to the non-adapted wheat powdery mildew  
87 fungus *Blumeria graminis* f.sp. *tritici* (*Bgt*) but a host of the powdery mildew fungus *B.*  
88 *graminis* f.sp. *hordei* (*Bgh*) causing up to 30% yield loss in the absence of genetic or  
89 chemical control of the disease (Oerke, 2006, Panstruga & Schulze-Lefert, 2002). The  
90 epidemic spread of *B. graminis* is caused by the asexual propagation of the fungus, with a  
91 generation time of 5-7 days and massive production of conidiospores (Figure 1). The  
92 interaction between different barley genotypes and *Bgh* isolates represents a well-studied  
93 model system for a fungal disease caused by an obligate biotrophic pathogen, and a growing  
94 number of host-response factors for defense or disease establishment have been identified  
95 (Collinge, 2009, Huckelhoven, 2007, Huckelhoven & Panstruga, 2011). The genome of *Bgh*  
96 was found to encode over 500 candidate secreted effector proteins (Pedersen *et al.*, 2012).  
97 As described in plant-pathogenic *Pseudomonas* sp. bacteria or in filamentous *Oomycete*  
98 pathogens, *Bgh* effectors are likely to target host ubiquitination components, too. However,  
99 up to present this remains speculative based on conceptual considerations and  
100 extrapolation. In a phenotype-driven, transient RNA interference (RNAi) screen for the  
101 discovery of *Rnr* (for *Required for nonhost resistance*) genes to the non-adapted wheat  
102 powdery mildew fungus *B.graminis* f.sp. *tritici* (*Bgt*), we tested over 631 barley genes, which  
103 were mostly associated with up-regulated transcripts in *Bgt*-attacked barley leaf epidermis  
104 (Douchkov *et al.*, 2014). Reduced NHR was reflected by an increased percentage of  
105 transformed epidermal cells containing *Bgt* haustoria. Out of 46 RNAi target genes that  
106 fulfilled the selection criteria during the first screening round of transient-induced gene

107 silencing (TIGS), 10 final *Rnr* gene candidates significantly enhanced nonhost susceptibility  
108 upon silencing.

109 Here we present structural and functional data to validate *Rnr5* encoding *HvARM1*  
110 with homology to PUBs. Besides its possible role in NHR that allowed discovery in the NHR  
111 RNAi screening, functional analysis suggested *Rnr5* as an important factor of QR against the  
112 adapted *Bgh* fungus.

113

## 114 **MATERIALS AND METHODS**

115

116 A more detailed description of materials and methods used in this study is provided in  
117 Supporting Information.

118

### 119 *Plant and fungal material*

120 For the TIGS and transient overexpression experiments 7-day-old seedlings of spring barley  
121 cv. Maythorpe and Golden Promise were used, respectively. As exception and for better  
122 comparability to transgenic plants, TIGS experiments for *HvPUB15* and *HvARM1* were also  
123 done in cv. G. Promise. Stable transgenic barley plants of cv. G. Promise were generated as  
124 described (Hensel *et al.*, 2008). Bombarded leaf segments or transgenic plants were  
125 inoculated with Swiss *Bgt* field isolate FAL 92315, or Swiss *Bgh* field isolate CH4.8  
126 throughout the study.

127

### 128 *Exome capture sequencing*

129 Genomic DNA was extracted from barley leaf material from a single plant for each accession  
130 and used for the hybridization with the barley SeqCap Ez oligo pool (Design Name:  
131 120426\_Barley\_BEC\_D04, (Mascher *et al.*, 2013). Quality-trimmed reads were mapped to  
132 the reference genome ([http://webblast.ipk-gatersleben.de/barley\\_ibsc/downloads/](http://webblast.ipk-gatersleben.de/barley_ibsc/downloads/)) with BWA  
133 version 0.7.5a using the mem algorithm with default parameters (Li & Durbin, 2009) and  
134 retaining only properly paired reads. Variant calling and realignment around indels were

135 performed with GATK, version 2.7.4 (<https://www.broadinstitute.org/gatk/>). Variant calls were  
136 filtered for high quality and  $\geq 80\%$  of samples being represented at each locus, and a dataset  
137 of 449585 SNPs was produced, suitable for association-genetic analysis of the two genes  
138 under investigation (full information about genome wide variants from this dataset will be  
139 published elsewhere).

140

#### 141 *Association genetic analysis*

142 Association of SNP and gene-haplotypes (marker) of *HvARM1* and *HvPUB15* with the  
143 severity of *Bgh* infection (trait) was calculated based on genetic and phenotypic data of two  
144 diverse collections of cultivated barley (*H. vulgare* ssp. *vulgare*). *Bgh* infection values were  
145 determined in a detached leaf assay using second leaves of approximately 12-day-old  
146 seedlings, as described (Spies et al., 2012). First, a worldwide collection of 76 landraces  
147 (WHEALBI\_LRC) was inoculated either with isolate JKI-75 or JKI-242 that exhibit a complex  
148 and complementing virulence spectra (Šurlan-Momirović et al., 2016). Second, a worldwide  
149 collection of 127 cultivars (WHEALBI\_CULT) was inoculated with the same 2 *Bgh* isolates.  
150 Both populations consisted of single seed-derived lines, and an average of 5 parallel plants  
151 per line was used in each inoculation assay. For passport data of all lines see supplemental  
152 Table S1. Seven days after inoculation, disease was scored by estimating the percentage of  
153 leaf area covered by fungal mycelium. Because disease scores were variable between  
154 different inoculation experiments they were normalized to internal standards cv. Roland or  
155 Morex, as indicated. Phenotypic data of all isolate-genotype combinations are based on 2  
156 independent inoculation series. SNP calls were derived from exome capture re-sequencing,  
157 and haplotypes were calculated based on the combination of SNP calls per gene. SNP-trait  
158 and haplotype-trait associations were calculated in TASSEL v4.1 using a mixed linear model  
159 with kinship as random effect. Marker data for kinship calculations were derived from 4032  
160 polymorphic “Genotyping by Sequencing” (GBS) markers. Marker-trait associations were  
161 assumed significant if the Holm’s-corrected p value was  $<0.05$  (number of SNP or  
162 haplotypes/gene = number of tests).

163

164 *TIGS and transient over-expression*

165 TIGS constructs were generated and transferred by particle bombardment into leaf epidermal  
166 cells of 7-day-old barley seedlings as described (Douchkov *et al.*, 2005). Leaf segments were  
167 inoculated three days after the bombardment with *Bgh* at a density of 140-180 conidia mm<sup>-2</sup>.  
168 Transformed GUS-stained epidermal cells as well as haustoria-containing transformed  
169 (susceptible) cells were counted 48 hours after inoculation, and TIGS effects on the  
170 susceptibility index (SI) were statistically analyzed (Spies *et al.*, 2012).

171 For transient overexpression, a HvARM1-containing BAC clone  
172 HVVMRXALLhA0581d24 (Acc. Nr. KM979563) was bombarded into leaf segments of barley  
173 cv. Maythorpe or wheat cv. Kanzler, followed by challenge inoculation with the corresponding  
174 adapted pathogen *Bgh* or *Bgt* 4 hours after the bombardment and microscopic assessment  
175 of SI 48 hours after inoculation. For verification of transgene effects, HvARM1 was excised  
176 from a subclone of the above-mentioned BAC as *StuI*/*SphI* fragment and inserted into  
177 *SmaI*/*SphI* sites of pIPKTA09. For transient overexpression of candidate genes, full-coding  
178 sequences were PCR amplified from cDNA and inserted as *XbaI* fragment into to the multiple  
179 cloning site of pIPKTA09 (Zimmermann *et al.*, 2006). The resulting sequence-verified  
180 constructs were bombarded into barley as described for BAC clones. For PCR primers used  
181 in this study see supporting Table S6.

182 For the Thf1:YFP and ClpS1:YFP degradation assay (Figure 7), four µg of respective  
183 plasmid DNA plus pUbiGUS (Douchkov *et al.*, 2005) were co-bombarded into 7-day-old  
184 barley cv. G. Promise. The numbers of YFP-fluorescing cells with plastid-localized signals  
185 were counted 24 hours after particle bombardment, followed by GUS-staining (Douchkov *et*  
186 *al.*, 2005). The numbers of GUS-expressing cells were used for normalization of the YFP  
187 signal.

188

189 *Inoculation and evaluation of transgenic plants*

190 Phenotypic evaluation of *Bgh* and *Bgt* interactions was done microscopically on second,  
191 detached leaves of 12-14 day-old plants placed on phytoagar plates (23,2 cm x 23,2 cm)  
192 inoculated at a spore density of 30-40 conidia mm<sup>-2</sup>. Inoculated leaf segments were  
193 incubated for 48 hours (*Bgh*) or 72 hours (*Bgt*) followed by staining with Coomassie brilliant  
194 blue R 250 (Schweizer *et al.*, 1993). The number of growing colonies/leaf area was counted  
195 under a standard bright field microscope at 100 x magnification.

196

#### 197 *Yeast-two-hybrid experiments*

198 Yeast-two-hybrid screening was performed according to the Yeast Handbook and manual of  
199 Matchmaker™ library-construction and -screening kits (Takara/Clontech Laboratories, Saint-  
200 Germain-en-Laye, France). Full length coding sequence of HvARM1 (1-442 AA) was used to  
201 screen a library of 7 x 10<sup>6</sup> mating events according to (Hoefle *et al.*, 2011). For targeted Y2H  
202 assays, the coding region (1-831 AA) of HvPUB15 was used to test positive prey clones of  
203 the HvARM1 screening.

204

#### 205 *Bimolecular fluorescence complementation and co-immunoprecipitation*

206 For bimolecular fluorescence complementation (BiFC) of HvARM1 and HvPUB15 proteins  
207 with potential plastid interactors, *Nicotiana benaminiana* plants were grown and agro-  
208 infiltrated as described in detail in Supporting Information Methods S1. For BiFC with HvThf1  
209 and HvClpS1, the wild-type full-length sequences of *HvPUB15* or *HvARM1*, U-box mutants of  
210 *HvPUB15*, the ARM-domain (351 to 831 AA) only of *HvPUB15*, or *HvThf1* without N-terminal  
211 plastid import signal (-SP) were cloned into 35S::<sup>GW</sup>VYNE-pBar and 35S::<sup>GW</sup>VYCE-pBar  
212 GATEWAY destination vectors containing the N- and C-terminal split parts of the enhanced  
213 YFP protein *Venus*, respectively (Thormahlen *et al.*, 2015). BiFC constructs were transiently  
214 co-expressed by infiltration of *Agrobacterium tumefaciens* transformed with the  
215 corresponding binary vectors, and examined by confocal laser-scanning microscopy (CLSM)  
216 48 hours after infiltration. For the development of U-box mutants, DNA fragment between



217 709-739 bp (from ATG) on the U-box domain of HvPUB15 was excised using BsaXI and  
218 replaced by ligating synthetic oligos carrying the respective U-box mutation.

219 For co-immunoprecipitation (Co-IP), YFP-tagged HvARM1 and HvPUB15<sup>ARM</sup> under  
220 the control of 35S promoter were generated by cloning the full-coding sequence of HvARM1  
221 (1-442 AA) or the ARM-repeat region of HvPUB15 (351-831 AA) into pEARLEYGATE104  
222 (Earley et al., 2006). cMyc-Tagged HvThf1 (1-294 AA) and HvCIP1 (1-161 AA) under the  
223 control of the CaMV 35S promoter were generated by cloning into pGWB418 (Nakagawa et  
224 al., 2007). Mesophyll-protoplast transformation and co-immunoprecipitation was done as  
225 described (Stegmann *et al.*, 2012).

226

### 227 *Subcellular localization of fluorescent proteins*

228 For subcellular localization, full-length sequences of HvPUB15, HvARM1, HvThf1 and  
229 HvCIP1 were N- and C-terminally fused in-frame to YFP in pIPKTA48 and pIPKTA49  
230 vectors (Supporting Information Figures S9 and S10). Resulting YFP-fusion constructs were  
231 transiently expressed in 7-day-old barley leaf segments by particle bombardment and  
232 examined after 12-24 hours of incubation with or without *B. graminis* inoculation using  
233 confocal laser-scanning microscopy (CLSM).

234

## 235 **RESULTS**

236

### 237 *Origin and evolution of HvARM1*

238 Transient single-cell silencing of *Rnr5* significantly reduced NHR of barley to *Bgt* (Douchkov  
239 *et al.*, 2014). BlastX analysis revealed homology of *Rnr5* to plant U-box type E3 ligases  
240 (PUBs) with an armadillo-(ARM) repeat as second conserved domain (Azevedo *et al.*, 2001,  
241 Mudgil *et al.*, 2004). Although *Rnr5* was most closely related to *OsPUB15* in rice (Zeng *et al.*,  
242 2008) it does not appear to be the barley ortholog because the encoded protein of 442 amino  
243 acids is considerably shorter than a regular PUB and contains only the C-terminal ARM-  
244 repeat region as conserved domain (Figure 2a and supporting Figure S1). The barley

245 genome also contains a gene for a full-length PUB protein of 831 amino acids with highest  
246 similarity to *OsPUB15* that was therefore named *HvPUB15*, whereas *Rnr5* was designated  
247 as *HvARM1* (Table 1). Protein similarity between *HvPUB15* and *HvARM1* starts at position  
248 L398 and L9 of *HvPUB15* and *HvARM1*, respectively, between the conserved U-box and  
249 ARM-repeat regions of *HvPUB15* (supporting Figure S2). Sequence similarity between the  
250 two genes extends upstream from the *HvARM1* initiating codon spanning the first intron of  
251 *HvARM1*, which corresponds to exon 3 sequence of *HvPUB15*, until it abruptly ends within  
252 the U-box sequence of *HvPUB15*. Further upstream sequence inside *HvARM1* intron 1 as  
253 well as the non-translated exon1 sequence did not exhibit significant similarity to any  
254 annotated gene or repetitive DNA element in the barley genome. These results strongly  
255 suggest that *HvARM1* originated as a partial gene duplicate of *HvPUB15*. An 8-bp deletion  
256 downstream from the first five N-terminal amino acids of *HvARM1* restored the initial reading  
257 frame because its initiating ATG corresponds to an out-of-frame codon of *HvPUB15* (Figure  
258 2b and c). Whole-genome shotgun (WGS) sequences of three additional species of the  
259 *Triticeae* tribe of grasses, the wild wheat species *Aegilops tauschii* and *Triticum urartu* plus  
260 rye (*Secale cereale*), also revealed the presence of *HvARM1*-like genes suggesting a  
261 monophyletic origin of the partial gene-duplication event in a common *Triticeae* ancestor  
262 dating back at least 12 M years (Figure 2d). Protein-sequence conservation among the four  
263 species was found to be high in both the U-box containing N-terminal- and the ARM-repeat  
264 containing C-terminal part of *PUB15*, the existing polymorphisms being in agreement with  
265 phylogenetic species distances. By contrast, sequence conservation was reduced among  
266 *ARM1* proteins, most clearly evident when comparing the two wild wheat species. To  
267 address the question if different evolutionary constrains act on *PUB15* and *ARM1* genes we  
268 searched both orthologous gene groups for footprints of purifying or diversifying selection by  
269 calculating  $K_a/K_s$  ratios in windows of 40 amino acids within the overlapping parts of both  
270 proteins. Because a  $K_a/K_s$  ratio of 1 indicates neutral selection, we tested mean  $K_a/K_s$  of all  
271 six possible pairwise sequence comparisons between the four species for significant  
272 differences from the null-hypothetical value “1”. As shown in Figure 2e, both genes are

273 subjected to purifying selection at the very N-terminus of ARM1 and within the ARM-repeat  
274 region. Selection was neutral in ARM1 outside these regions whereas PUB15 sequences  
275 remained under purifying selection along the entire ARM1-overlapping part of the gene. This  
276 suggests that the function of ARM1 proteins is restricted to the binding of one or a few  
277 protein ligand(s) via its ARM repeats whereas structural constrains on full-length E3-ligases  
278 that have to bind to substrate proteins and mediate the interaction with the highly conserved  
279 UBC domain of E2's are probably more stringent.

280

### 281 *Allelic variants of HvARM1*

282 The phylogenetic and functional (see below) data of *ARM1* suggest that the gene is under  
283 selection for maintaining a quantitative level of resistance of *Triticeae* species to powdery  
284 mildew infection. We therefore analyzed gene variants (alleles) in a diverse collection of  
285 barley genotypes (supporting Tables S1 and S2) for significant association with powdery-  
286 mildew interactions. To address this question further we carried out an association-genetic  
287 analysis of single nucleotide polymorphism (SNP) and gene-haplotypes with powdery-mildew  
288 resistance or -susceptibility. As shown in Table 2 this led to the identification of SNP- as well  
289 as gene-haplotype polymorphisms in two diverse, world-wide collections of barley landraces  
290 and cultivars that were significantly associated with quantitative powdery mildew resistance.  
291 No association of *HvPUB15* gene variants with the same trait was found in any population  
292 (Table 2). This result strengthens the point that *HvARM1* – despite its partial nature –  
293 represents a functional gene protecting barley from powdery mildew attack, whereas the  
294 cellular functions of *HvPUB15* are probably more complex.

295

### 296 *Function of HvARM1 during powdery-mildew attack*

297 To validate the TIGS effect of *HvARM1* in the nonhost interaction with *Bgt* (Douchkov et al.,  
298 2014), and to further assess its role in the interaction with the adapted *Bgh* we generated  
299 transgenic plants with silenced *HvARM1*. Approximately 25% of progeny from T0 primary  
300 transformants died after a few weeks suggesting lethality caused by the homozygous

301 transgene locus, in line with the failure to identify homozygous T2 or T3 lines  
302 (Figure 3c, pot Nr. 1 in left-hand panel). It is known that homozygous transgenic plants  
303 usually exhibit strongest transgene effects, and this may have caused off-target silencing of  
304 the related, housekeeping *HvPUB15* gene as suggested from *in silico* off-target prediction of  
305 the RNAi transgene by the si-Fi software. Using default settings including end-stability  
306 difference and target-site accessibility thresholds, the software predicted 33 and 6 efficient  
307 21nt siRNAs for *HvARM1* and *HvPUB15*, respectively (supporting Figure S3). The  
308 suspected toxicity of *HvPUB15* off-target silencing in homozygous RNAi plants is supported  
309 by observations in *Oryza sativa* (rice), where a detrimental effect of knock-out mutation of  
310 *OsPUB15* was described including seedling lethality and severe growth retardation (Park et  
311 al., 2011). On the other hand, the normally developing T3 transgenic lines consistently  
312 exhibited silencing of *HvARM1* whereas no evidence for a reduction of *HvPUB15* mRNA  
313 levels was found (Figure 3a).

314 Because *HvARM1* was discovered in a TIGS screen for attenuated NHR we first  
315 tested T3 progeny of three selected events for susceptibility to *Bgt* (Table 3). Although there  
316 was a considerable variability between individuals per line, two lines exhibited approximately  
317 five-fold higher susceptibility to the non-adapted fungus as compared to the control group of  
318 azygous segregant plants. In general, azygous plants are considered as better controls since  
319 they had undergone the same transformation procedures and lost the transgenic construct  
320 by segregation. As seen in Table 3, the transformation procedure apparent had an impact on  
321 the *Bgt* interaction because the azygous control group was on average more susceptible  
322 than Golden Promise wildtype plants. Figure 3b shows that the three selected events were  
323 also more susceptible to *Bgh*, compared to a population of control plants consisting of  
324 azygous segregants plus progeny from three azygous individuals identified in the T2  
325 generation.

326 Bombardment with strictly gene-specific RNAi- and with over-expression (OEX)  
327 constructs for a direct comparison of altered *HvARM1* versus *HvPUB15* expression levels  
328 revealed that gene-specific *HvARM1* silencing increased the relative susceptibility index (SI)

329 to *Bgh*, in line with the super-susceptibility observed in stable transgenic barley T3 plants  
330 (Table 4). On the other hand, we found no significant effects of altering *HvPUB15* mRNA  
331 levels on the interaction of transformed cells with *Bgh* again indicating more complex,  
332 homoeostatic rather than defense-related functions of the encoded protein. Following  
333 powdery mildew inoculation, endogenous transcript levels of *HvARM1* in peeled leaf  
334 epidermis were more strongly up-regulated above a basal level of expression compared to  
335 *HvPUB15* (supporting Figure S4), which also suggests a defense-related role of *HvARM1*.

336

### 337 *Localization and protein interactions of HvPUB15 and HvARM1*

338 Fusion proteins of *HvARM1* and *HvPUB15* with the yellow fluorescent protein (YFP) showed  
339 a similar fluorescence pattern as non-fused YFP suggesting nucleo-cytoplasmic localization  
340 (supporting Figure S5, panels a-c), in agreement with the localization of the proposed rice  
341 orthologue *OsPUB15* (Park *et al.*, 2011). Because the presence of the conserved ARM  
342 protein-protein interaction domain in *HvARM1* suggests binding to other barley protein(s), we  
343 carried out a yeast-two-hybrid screening in a prey library from *Bgh*-attacked barley leaves  
344 using *HvARM1* as bait. This led to the identification of six barley proteins that interacted  
345 strongly and reproducibly with *HvARM1* (Figure 4a and supporting Table S3). Out of these  
346 six candidates the homologs of the Clp-protease adaptor protein ClpS1 and the thylakoid  
347 formation 1 protein THF1 of *A. thaliana* (Huang *et al.*, 2006, Nishimura *et al.*, 2013) were also  
348 strongly interacting with *HvPUB15* (Figure 4b), which suggests them as ubiquitination  
349 substrates of the E3 ligase. By using an *in vitro* ubiquitination assay we could show that  
350 *HvPUB15* has ubiquitin ligase activity (supporting Figure S6). Because *HvPUB15* catalyzed  
351 the polymerization of ubiquitin chains rather than auto-ubiquitination it might be an E4- rather  
352 than an E3-ligase (Koegl *et al.*, 1999). The possible involvement of all six *HvARM1*-  
353 interacting proteins in mediating QR or susceptibility to *Bgh* was tested by TIGS, which  
354 revealed a trend for reduced susceptibility by silencing of *HvThf1* (Table 4). Transient OEX of  
355 *HvThf1* resulted in significantly enhanced susceptibility to *Bgh* thereby proposing the  
356 encoded potential *HvPUB15* substrate protein to function as host susceptibility factor.

357 Transient OEX of the second proposed HvPUB15 substrate, *HvClpS1*, also enhanced  
358 susceptibility to *Bgh* thereby indicating a role as host susceptibility factor, too, although there  
359 was no significant effect of *HvClpS1* silencing. Co-localization experiments of HvThf1-YFP  
360 and HvClpS1-YFP C-terminal fusion proteins with the plastid marker Rubisco small subunit  
361 (Nelson *et al.*, 2007) confirmed their expected plastid localization (supporting Figure S5,  
362 panels d-k).

363 *In vivo* interaction of HvARM1, HvPUB15 and HvPUB15<sup>ARM</sup> (the ARM-domain of  
364 HvPUB15) with HvThf1 and HvClpS1 was assessed by split-YFP bimolecular functional  
365 complementation (BiFC) assays in *Agrobacterium*-infiltrated *Nicotiana bentaminiana* leaves  
366 and by co-immunoprecipitation in *A. thaliana* protoplasts. Figure 5 shows that the transient  
367 co-expression of HvPUB15 or HvPUB15<sup>ARM</sup> with either HvClpS1 or HvThf1 gave rise to BiFC  
368 (YFP) signals primarily in epidermal cells. The localization patterns of the fluorescence  
369 signals indicated that the proteins interacted in the cytoplasm, which was confirmed by the  
370 absence of co-localization with the plastid marker protein 35S:SSU<sub>1-79</sub>-mCherry (Rajaraman,  
371 unpublished result). The BiFC signals were abolished or strongly reduced by using the U-box  
372 mutant HvPUB15<sup>P245A</sup> as interaction partner, suggesting specificity of the interaction.  
373 HvARM1 also interacted with HvClpS1 and HvThf1. Moreover, interactions were observed  
374 between HvPUB15 and HvARM1, and here, the HvPUB15 U-box mutation increased BiFC  
375 signals instead of reducing them. For additional controls and quantitative fluorescence data  
376 see supporting Figures S7 and S8. Co-immunoprecipitation experiments in *A. thaliana*  
377 protoplasts of cMyc-tagged HvARM1 and HvPUB15<sup>ARM</sup> together with either HvThf1 or  
378 HvClpS1 confirmed *in vivo* interaction of HvPUB15<sup>ARM</sup> with HvThf1, HvARM1 with HvThf1,  
379 and HvARM1 with HvClpS1 (Figure 6).

380 The two HvPUB15 interacting proteins HvThf1 and HvClpS1 may be *in vivo*  
381 ubiquitination substrates. This possibility was tested by transient over-expression of  
382 *HvPUB15* together with either HvThf1:YFP or HvClpS1:YFP, followed by the quantification of  
383 YFP-fluorescing cells 24 hours after the bombardment. As shown in Figure 7, co-expression  
384 with *HvPUB15* significantly reduced the number of HvThf1:YFP- but not HvClpS1:YFP-

385 fluorescing cells suggesting that HvThf1 is an *in vivo* substrate to HvPUB15. Taken together,  
386 the data suggest *in vivo* interaction of HvPUB15 with the putative substrate proteins HvClpS1  
387 and HvThf1, whereby the presence of an intact U-box stabilized the interaction. In addition,  
388 HvARM1 as well as the ARM-domain of HvPUB15 interacted with HvClpS1 and HvThf1, too.  
389 One of the HvPUB15-interacting proteins, HvThf1, was identified as potential ubiquitination  
390 substrate and as host susceptibility factor to *Bgh*.

391 Does the partially duplicated gene pair of PUB15 and ARM1 represent a unique event  
392 in *Triticeae* genome evolution, or could we find indications for additional partial gene  
393 duplicates with putative functions? To address this question we conducted a genome-wide  
394 search for full-length cDNA sequences with high sequence similarity but clearly different  
395 length of their longest open reading frames. Starting with a library of 23,614 full-length cDNA  
396 sequences (<http://barleyflc.dna.affrc.go.jp/bexdb/>), we found 1154 matching cDNA pairs with  
397 a sequence identity of 80-99% and an alignment-to-shorter-gene length ratio of at least 0.8,  
398 thereby excluding pairs of non-partial genes just sharing functional domains. A subsequent  
399 tBlastx analysis of these pairs revealed 205 pairs with a length difference of matching open  
400 reading frames of >25%. After further filtering steps to exclude non-spliced transcripts,  
401 chimeric- as well as partial clones, we identified 11 expressed pairs of putative, partially  
402 duplicated genes including *HvPUB15/HvARM1* (supporting Table S4). A majority of these are  
403 localized at non-tandem positions (5 or more gene models apart from each other, or on  
404 different chromosomes). Interestingly, although this was not a criterion for their selection,  
405 transcripts from the partially duplicated genes appeared to be more frequently regulated by  
406 powdery mildew attack (Figure 8a). This suggests that partial gene duplicates might be  
407 preferentially selected for new functions in stress responses such as pathogen attack. As  
408 another example of a partially duplicated gene and protein pair besides HvPUB15/HvARM1,  
409 we show the alignment of a DUF 4228 protein of unknown function (Figure 8b and c). This  
410 pair, which is located 5 gene models apart from each other on chromosome 7H, is  
411 characterized by a clear gain in transcript regulation of the shorter version and by a perfect

412 triple repeat of a highly hydrophilic motif in the duplicated part of the protein. Its functional  
413 analysis in pathogen-attacked barley will be a future challenge.

414

## 415 **DISCUSSION**

416

417 The genomes of four species of the *Triticeae* tribe of grasses contain *ARM1*, a partial copy of  
418 a U-box/ARM-repeat E3 ligase closely related to the rice protein OsPUB15 (Park *et al.*,  
419 2011). The rice genome also contains a number of “ARM-repeat only” genes but none of  
420 them appears to represent a partial copy of OsPUB15, because BlastN analysis of the ARM-  
421 repeat region of OsPUB15 (pos. 2000-2952 in cDNA Acc. AK10655) at NCBI did not produce  
422 significant hits for any other rice gene. By contrast, the same query sequence revealed  
423 HvARM1 as the most significant hit (86% identity) in barley. Sequence analysis in cultivated  
424 barley and rye, and in two diploid wild wheat species suggest a monophyletic origin of *ARM1*.  
425 In a TIGS screening for genes required for NHR in barley, we discovered *Rnr5* encoding  
426 HvARM1 as potential factor for resistance to the non-adapted powdery mildew fungus *Bgt*.  
427 Here we show that HvARM1 is not only involved in NHR but is also a factor for QR to  
428 adapted powdery mildew fungi in barley and wheat.

429 The large and highly repetitive genomes of the cultivated *Triticeae* species barley,  
430 wheat and rye appear to be particularly rich in gene-like sequences including partial  
431 duplicates, and most of them were classified as putative pseudogenes (Akhunov *et al.*, 2013,  
432 Wicker *et al.*, 2011, Bauer *et al.*, 2017). The classification criteria for these putative  
433 pseudogenes were (i) non-syntenic map positions among grasses and (ii) unique occurrence  
434 in one species or in one of the three sub-genomes of hexaploid wheat. Illegitimate meiotic  
435 crossing over and subsequent sequence capture by transposable elements, as well as  
436 random-sequence insertion during non-homologous end joining for double-strand break DNA  
437 repair are the two proposed major events leading to non-tandem (partial) gene duplicates  
438 (Katju & Lynch, 2003). By contrast, sub- or neo-functionalized, expressed and full-length  
439 gene duplicates often exist as tandemly repeated gene pairs or clusters of genes, as a result



440 of unequal crossover during meiosis that often followed by gene-conversions (Himmelbach *et*  
441 *al.*, 2010, Leister, 2004). As shown in Table 1, the full-length genes *HvPUB15* and *AetPUB15*  
442 share syntenic map positions on the long arm of homologous chromosome group 3 (Luo *et*  
443 *al.*, 2013, Mascher *et al.*, 2013). The partially duplicated *HvARM1* gene was mapped at a  
444 distance of approximately 95 Mbp from *HvPUB15* on chromosome 3H, and all four analyzed  
445 *Triticeae ARM1* genes contain a non-repetitive, unknown sequence in exon 1 that is not  
446 present in the corresponding *PUB15*-like genes. Taken together this suggests that an event  
447 of DNA double-strand break repair in a common ancestor of the four *Triticeae* species gave  
448 rise to *ARM1*.

449         However, the results presented here suggest that *ARM1* escaped pseudogenization  
450 and took over a new biological function in defense against powdery mildew fungi and  
451 perhaps other pathogens: First, the genomes of four species belonging to three different  
452 *genera* maintained the partial gene copy with a high degree of sequence conservation at the  
453 ARM-repeat region. Second, in all four species *ARM1* is supported by perfectly matching  
454 EST sequences or other transcriptome data, demonstrating that the corresponding genes are  
455 actively transcribed. In barley, transcript-regulation data suggest a gain of function of  
456 *HvARM1* in terms of a more pronounced pathogen-induced accumulation in the epidermis  
457 compared to *HvPUB15* (supporting Figure S4). Third, all *ARM1* sequences are characterized  
458 by intact open reading frames starting approximately in the middle part of the *PUB15* protein  
459 and extending to its C-terminus. Forth, allelic variants of *HvARM1* were found to be  
460 significantly associated with the severity of powdery-mildew infection in collections of locally  
461 adapted barley landraces and diverse cultivars (Table 2 and supporting Table S1). In both  
462 collections the most significant SNP were associated with clear and statistically significant  
463 differences in Bgh infection (41% versus 57%,  $p=0.00037$  in WHEALBI\_LRC; 35% versus  
464 51%,  $p=0.023$  in WHEALBI\_CULT). The significant SNP in the landrace collection was  
465 located in the 5' non-translated region of the *HvARM1* transcript whereas the significant SNP  
466 in the cultivar collection causes a Glycine to Valine change at position 437 of the encoded  
467 protein. The cultivars carrying the corresponding significant, resistance-associated haplotype

468 H01 were derived from very different regions of the world and therefore, probably not similar  
469 by descent. The complete absence of association of HvPUB15 alleles with *Bgh* infection  
470 furthermore supports the view that the E3 ligase primarily has important housekeeping  
471 functions such as quality control and turning over of plastid-localized proteins (Woodson *et*  
472 *al.*, 2015), with no adaptation flexibility during pathogen co-evolution.

473 Functional tests of *HvARM1* by gene silencing in barley and by transient over-  
474 expression in wheat suggested a resistance-related role during the interaction with adapted  
475 and non-adapted powdery mildew fungi. Similar to the results presented here, a resistance-  
476 enhancing effect was found by over-expression of the ARM domain of the *AtPUB13* gene in  
477 *A. thaliana*, which is involved in protein degradation of the flagellin PAMP receptor FLS2,  
478 (Zhou *et al.*, 2015). Transgenic plants phenocopied the *atpub12/13* double-mutant effect of  
479 enhanced pathogen resistance. The results presented here for *ARM1* genes of *Triticeae*  
480 species suggest that plants use ARM-domain expression as natural mechanism for  
481 enhancing disease resistance. Results in rice also proposed a defense-related role of  
482 *OsPUB15* because over-expression caused spontaneous defense responses and increased  
483 pathogen resistance (Wang *et al.*, 2015). However, we could not confirm such an activity by  
484 TIGS or transient OEX of the barley homologue *HvPUB15* (Table 4). Together with the  
485 reported lethality of *OsPUB15* mutations in rice and with the indications of lethal *HvPUB15*  
486 off-targeting in homozygous RNAi lines of barley that carry a hairpin construct against  
487 *HvARM1*, these results propose *HvPUB15* as a housekeeping gene that is not directly  
488 involved in pathogen defense, at least not against *Bgh*.

489 The *HvARM1* and *HvPUB15* proteins interacted in yeast and in plants with the  
490 plastid-localized proteins *HvClpS1* and *HvThf1*, and both appear to be susceptibility-related  
491 factors based on TIGS- and transient over-expression results. Interestingly, transcripts of  
492 both *HvClpS1* and *HvThf1* were found to be down-regulated in peeled epidermis by powdery  
493 mildew attack, a response that may be expected for susceptibility-related factors (supporting  
494 Figure S9 and Table S3). Currently, the evidence for *HvThf1* to be relevant for the powdery-  
495 mildew interaction is stronger compared to *HvClpS1* because only TIGS of *HvThf1* resulted

496 in a (one-sided significant) trend for enhanced resistance, thereby complementing the  
497 transient OEX data, and because OEX of HvPUB15 resulted only in a reduction of tagged  
498 HvThf1 protein - but not of HvClpS1 protein - amounts. Therefore, we will concentrate the  
499 discussion on HvThf1 as interaction partner here. The THF1 protein of *A. thaliana* was not  
500 only found to be localized in the plastid stroma but also at its outer membrane facing the  
501 cytoplasm where it was proposed to play a role in sugar sensing (Huang *et al.*, 2006). The  
502 plastid-internal pool was implicated in degradation of chlorophyll-protein complexes,  
503 especially the core complex proteins D1 and D2, during leaf senescence of *A. thaliana* and  
504 *Oryza sativa* (Huang *et al.*, 2006, Wang *et al.*, 2004, Yamatani *et al.*, 2013). In both rice and  
505 *A. thaliana*, *thf1* mutants exhibited a stay-green phenotype after the onset of dark-induced  
506 senescence and were also impaired in adaption to high-light conditions, which resulted in  
507 photobleaching probably due to excess electron flux from PSII. In the powdery mildew-  
508 affected epidermis containing mainly photosynthetically inactive leucoplasts, sugar sensing  
509 for controlled carbohydrate delivery to established *Bgh* haustoria might be more relevant  
510 than control of photo-oxidative damage. It is known that powdery mildew-infected cells have  
511 a very high demand of energy equivalents and transport large amounts of glucose into  
512 haustoria, a process that appears to depend on SWEET sugar transporters and other factors  
513 (Chen *et al.*, 2010, Chen *et al.*, 2012, Scholes *et al.*, 1994). Support for the involvement of  
514 *Thf1* in disease responses comes from the finding that the closest wheat homolog to *HvThf1*,  
515 designated as *TaToxABP1*, acts as binding protein and target of Toxin A that is produced by  
516 the necrotrophic, tan-spot fungal pathogen *Pyrenophora tritici-repentis* (Manning *et al.*,  
517 2007). Toxin A-treatment also triggered an oxidative burst in leaves of wheat and barley  
518 (Manning *et al.*, 2010, Manning *et al.*, 2007, Pandelova *et al.*, 2012) thereby providing a link  
519 of *Thf1* function with ROS control, at least in chloroplasts, and propose a mode of action of  
520 Toxin A. Additional support for a relevant role of *Thf1* in plant susceptibility is provided by  
521 results showing interaction of the Thf1 protein with the I2-like coiled-coil (CC) domains of  
522 several NB LRR-type resistance proteins (Hamel *et al.*, 2016). One of the well-examined  
523 members of this group is the N protein mediating resistance in *Nicotiana tabacum* against

524 most Tobamoviruses. The authors found that THF1 strongly suppressed N-mediated HR and  
525 that the I2-domains of corresponding activated R-proteins interacted with Thf1 in the  
526 cytoplasm and thereby, destabilized the protein for degradation. Because cell-death  
527 suppression is a hallmark of susceptible interactions with biotrophic pathogens, the proposed  
528 function of HvThf1 as susceptibility factor to *Bgh* is in line with the proposed function in  
529 *Solanaceous* plants. The link of proteasomal protein degradation with chloroplast biology  
530 has recently been established by reports on the roles of the closest *HvPUB15* homolog in *A.*  
531 *thaliana* designated as *AtPUB4*, and of *AtCHIP*, in plastid quality control and degradation of  
532 the caseinolytic plastid peptidase AtClpP4, respectively (Wei et al., 2015; Woodshon et al.,  
533 2015). Mutants of *AtPUB4* showed reduced resilience against abiotic stress, indicative of  
534 compromised plastid-based control of ROS generation. Plants silenced in- or over-  
535 expressing *AtCHIP* exhibited a chlorotic phenotype indicating a strict requirement of accurate  
536 control of AtClpP4 levels for cellular homeostasis.

537 As a model for ARM1 function we propose that the partial duplicate *ARM1* of the  
538 ancestral *PUB15* gene was selected as an antagonist of PUB15 thereby disturbing the  
539 accurate quality and/or import control of the biotrophic susceptibility factor Thf1 (Figure 9).  
540 The antagonistic activity of ARM1 could take place by binding to free Thf1 pre-protein or by  
541 interacting with a PUB15/Thf1 proteasomal complex. According to the model, Thf1 inhibition  
542 will lead to disturbed sugar sensing and/or plastid functionality, which have to be postulated  
543 as requirements to support obligate biotrophic pathogens such as powdery mildew fungi. The  
544 possibility of Thf1 as inhibitor of resistance components such as R-proteins (Hamel et al.,  
545 2016) is also included in the model and would be compatible with the observed, rapid  
546 *HvARM1* TIGS effect on haustorium formation. The role of Thf1 in necrotrophic interactions  
547 may be opposite, i.e. resistance-related in terms of preventing pathogen-triggered cell death,  
548 which is in line with the observed targeting by the fungal toxin Prt ToxA (Manning et al.,  
549 2010). As known for other fungal pathogens, *Bgh* possesses a large arsenal of candidate  
550 secreted effector proteins, several of which have been found to contribute to host invasion  
551 (Pliego et al., 2013) (Whigham et al., 2015). Therefore it appears also possible that ARM1

552 acts as a mimic to protect the PUB15 protein from putative *Bgh* effector manipulation (Le  
553 Roux *et al.*, 2015, Sarris *et al.*, 2015). However, this possibility is currently not supported by  
554 data on ARM1-effector interactions.

555 In summary, our results suggest that *ARM1* was neo-functionalized after a non-  
556 tandem, partial gene duplication event of the E3-ligase *PUB15*, which occurred in a common  
557 ancestor of the *Triticeae* tribe of grasses and gained a role in broad-spectrum quantitative  
558 resistance against *B. graminis* and maybe other pathogenic fungi. At least in barley, the  
559 HvARM1-interacting protein and proposed substrate of HvPUB15, the plastid-localized  
560 HvThf1, links susceptibility to biotrophic pathogens with plastid functions. Future work for a  
561 better understanding of resistance-related ARM1 functions may include the characterization  
562 of null-allelic mutants and further allele-mining in barley genetic resources, combined with  
563 functional validation and introgression of superior alleles into modern adapted germplasm.  
564 The work presented here (Figure 8) also opens up possibilities to search for and functionally  
565 address additional partial gene duplicates in crop genomes for a neo-functionalized role in  
566 biotic-stress resistance.

567

## 568 **ACKNOWLEDGEMENTS**

569

570 This work was supported by the German Ministry for Education and Research, grant  
571 acronyms GABI-nonhost (to P.S.) and GABI-phenome (to P.S. and J.KU.), by German DFG  
572 (ERA-PG project TritNONHOST grant Nr. DFG Schw 848/2-1 to P.S.), by EU FP6 project  
573 BIOEXPLOIT (to P.S.) and by EU FP7 project WHEALBI (to P.S. and N.S). We would like to  
574 thank Gabi Brantin, Manuela Knauff, Sonja Gentz and Cornelia Marthe for excellent technical  
575 assistance.

576

577

578 **REFERENCES**

579

580 Abramovitch R.B., Janjusevic R., Stebbins C.E. & Martin G.B. (2006) Type III effector  
581 AvrPtoB requires intrinsic E3 ubiquitin ligase activity to suppress plant cell death and  
582 immunity. *Proceedings of the National Academy of Sciences of the United States of*  
583 *America*, **103**, 2851-2856.

584 Akhunov E.D., Sehgal S., Liang H.Q., Wang S.C., Akhunova A.R., Kaur G., Li W.L., Forrest  
585 K.L., See D., Simkova H., Ma Y.Q., Hayden M.J., Luo M.C., Faris J.D., Dolezel J. &  
586 Gill B.S. (2013) Comparative Analysis of Syntenic Genes in Grass Genomes Reveals  
587 Accelerated Rates of Gene Structure and Coding Sequence Evolution in Polyploid  
588 Wheat. *Plant Physiology*, **161**, 252-265.

589 Angot A., Peeters N., Lechner E., Vaillau F., Baud C., Gentzbittel L., Sartorel E., Genschik  
590 P., Boucher C. & Genin S.P. (2006) *Ralstonia solanacearum* requires F-box-like  
591 domain-containing type III effectors to promote disease on several host plants.  
592 *Proceedings of the National Academy of Sciences of the United States of America*,  
593 **103**, 14620-14625.

594 Azevedo C., Santos-Rosa M.J. & Shirasu K. (2001) The U-box protein family in plants.  
595 *Trends in Plant Science*, **6**, 354-358.

596 Bauer E., Schmutzer T., Barilar I., Mascher M., Gundlach H., Martis M.M., Twardziok S.O.,  
597 Hackauf B., Gordillo A., Wilde P., Schmidt M., Korzun V., Mayer K.F.X., Schmid K.,  
598 Schön C.-C. & Scholz U. (2017) Towards a whole-genome sequence for rye (*Secale*  
599 *cereale* L.). *The Plant Journal*, **89**, 853-869.

600 Bos J.I.B., Armstrong M.R., Gilroy E.M., Boevink P.C., Hein I., Taylor R.M., Tian Z.D.,  
601 Engelhardt S., Vetukuri R.R., Harrower B., Dixelius C., Bryan G., Sadanandom A.,  
602 Whisson S.C., Kamoun S. & Birch P.R.J. (2010) *Phytophthora infestans* effector  
603 AVR3a is essential for virulence and manipulates plant immunity by stabilizing host  
604 E3 ligase CMPG1. *Proceedings of the National Academy of Sciences of the United*  
605 *States of America*, **107**, 9909-9914.

- 606 Chen L.Q., Hou B.H., Lalonde S., Takanaga H., Hartung M.L., Qu X.Q., Guo W.J., Kim J.G.,  
607 Underwood W., Chaudhuri B., Chermak D., Antony G., White F.F., Somerville S.C.,  
608 Mudgett M.B. & Frommer W.B. (2010) Sugar transporters for intercellular exchange  
609 and nutrition of pathogens. *Nature*, **468**, 527-U199.
- 610 Chen L.Q., Qu X.Q., Hou B.H., Sosso D., Osorio S., Fernie A.R. & Frommer W.B. (2012)  
611 Sucrose Efflux Mediated by SWEET Proteins as a Key Step for Phloem Transport.  
612 *Science*, **335**, 207-211.
- 613 Collinge D.B. (2009) Cell wall appositions: the first line of defence. *Journal of Experimental*  
614 *Botany*, **60**, 351-352.
- 615 Douchkov D., Lück S., Johrde A., Nowara D., Himmelbach A., Rajaraman J., Stein N.,  
616 Sharma R., Kilian B. & Schweizer P. (2014) Discovery of genes for affecting  
617 resistance of barley to adapted and non-adapted powdery mildew fungi. *Genome*  
618 *Biology*, **15**, 518.
- 619 Douchkov D., Nowara D., Zierold U. & Schweizer P. (2005) A high-throughput gene-silencing  
620 system for the functional assessment of defense-related genes in barley epidermal  
621 cells. *Molecular Plant-Microbe Interactions*, **18**, 755-761.
- 622 Groll M., Schellenberg B., Bachmann A.S., Archer C.R., Huber R., Powell T.K., Lindow S.,  
623 Kaiser M. & Dudler R. (2008) A plant pathogen virulence factor inhibits the eukaryotic  
624 proteasome by a novel mechanism. *Nature*, **452**, 755-U757.
- 625 Hamel L.-P., Sekine K.-T., Wallon T., Sugiwaka Y., Kobayashi K. & Moffett P. (2016) The  
626 Chloroplastic Protein THF1 Interacts with the Coiled-Coil Domain of the Disease  
627 Resistance Protein N ' and Regulates Light-Dependent Cell Death. *Plant Physiology*,  
628 **171**, 658-674.
- 629 Hensel G., Valkov V., Middlefell-Williams J. & Kumlehn J. (2008) Efficient generation of  
630 transgenic barley: The way forward to modulate plant-microbe interactions. *Journal of*  
631 *Plant Physiology*, **165**, 71-82.
- 632 Himmelbach A., Liu L., Zierold U., Altschmied L., Maucher H., Beier F., Muller D., Hensel G.,  
633 Heise A., Schutzendubel A., Kumlehn J. & Schweizer P. (2010) Promoters of the

- 634 Barley Germin-Like GER4 Gene Cluster Enable Strong Transgene Expression in  
635 Response to Pathogen Attack. *Plant Cell*, **22**, 937-952.
- 636 Hoefle C., Huesmann C., Schultheiss H., Bornke F., Hensel G., Kumlehn J. & Huckelhoven  
637 R. (2011) A Barley ROP GTPase ACTIVATING PROTEIN Associates with  
638 Microtubules and Regulates Entry of the Barley Powdery Mildew Fungus into Leaf  
639 Epidermal Cells. *Plant Cell*, **23**, 2422-2439.
- 640 Huang J., Taylor J.P., Chen J.G., Uhrig J.F., Schnell D.J., Nakagawa T., Korth K.L. & Jones  
641 A.M. (2006) The plastid protein THYLAKOID FORMATION1 and the plasma  
642 membrane G-protein GPA1 interact in a novel sugar-signaling mechanism in  
643 Arabidopsis. *Plant Cell*, **18**, 1226-1238.
- 644 Huckelhoven R. (2007) Cell wall - Associated mechanisms of disease resistance and  
645 susceptibility. *Annual Review of Phytopathology*, **45**, 101-127.
- 646 Huckelhoven R. & Panstruga R. (2011) Cell biology of the plant-powdery mildew interaction.  
647 *Current Opinion in Plant Biology*, **14**, 738-746.
- 648 Katju V. & Lynch M. (2003) The structure and early evolution of recently arisen gene  
649 duplicates in the *Caenorhabditis elegans* genome. *Genetics*, **165**, 1793-1803.
- 650 Koegl M., Hoppe T., Schlenker S., Ulrich H.D., Mayer T.U. & Jentsch S. (1999) A novel  
651 ubiquitination factor, E4, is involved in multiubiquitin chain assembly. *Cell*, **96**, 635-  
652 644.
- 653 Le Roux C., Huet G., Jauneau A., Camborde L., Tremousaygue D., Kraut A., Zhou B.,  
654 Levaillant M., Adachi H., Yoshioka H., Raffaele S., Berthome R., Coute Y., Parker  
655 J.E. & Deslandes L. (2015) A Receptor Pair with an Integrated Decoy Converts  
656 Pathogen Disabling of Transcription Factors to Immunity. *Cell*, **161**, 1074-1088.
- 657 Leister D. (2004) Tandem and segmental gene duplication and recombination in the  
658 evolution of plant disease resistance genes. *Trends in Genetics*, **20**, 116-122.
- 659 Li H. & Durbin R. (2009) Fast and accurate short read alignment with Burrows–Wheeler  
660 transform. *Bioinformatics*, **25**, 1754-1760.



- 661 Luo M.C., Gu Y.Q., You F.M., Deal K.R., Ma Y.Q., Hu Y.Q., Huo N.X., Wang Y., Wang J.R.,  
662 Chen S.Y., Jorgensen C.M., Zhang Y., McGuire P.E., Pasternak S., Stein J.C., Ware  
663 D., Kramer M., McCombie W.R., Kianian S.F., Martis M.M., Mayer K.F.X., Sehgal  
664 S.K., Li W.L., Gill B.S., Bevan M.W., Simkova H., Dolezel J., Song W.N., Lazo G.R.,  
665 Anderson O.D. & Dvorak J. (2013) A 4-gigabase physical map unlocks the structure  
666 and evolution of the complex genome of *Aegilops tauschii*, the wheat D-genome  
667 progenitor. *Proceedings of the National Academy of Sciences of the United States of*  
668 *America*, **110**, 7940-7945.
- 669 Manning V.A., Chu A.L., Scofield S.R. & Ciuffetti L.M. (2010) Intracellular expression of a  
670 host-selective toxin, ToxA, in diverse plants phenocopies silencing of a ToxA-  
671 interacting protein, ToxABP1. *New Phytologist*, **187**, 1034-1047.
- 672 Manning V.A., Hardison L.K. & Ciuffetti L.M. (2007) Ptr ToxA interacts with a chloroplast-  
673 localized protein. *Molecular Plant-Microbe Interactions*, **20**, 168-177.
- 674 Mascher M., Gundlach H., Himmelbach A., Beier S., Twardziok S.O., Wicker T., Radchuk V.,  
675 Dockter C., Hedley P.E., Russell J., Bayer M., Ramsay L., Liu H., Haberer G., Zhang  
676 X.-Q., Zhang Q., Barrero R.A., Li L., Taudien S., Groth M., Felder M., Hastie A.,  
677 Šimková H., Staňková H., Vrána J., Chan S., Muñoz-Amatriaín M., Ounit R.,  
678 Wanamaker S., Bolser D., Colmsee C., Schmutzer T., Aliyeva-Schnorr L., Grasso S.,  
679 Tanskanen J., Chailyan A., Sampath D., Heavens D., Clissold L., Cao S., Chapman  
680 B., Dai F., Han Y., Li H., Li X., Lin C., McCooke J.K., Tan C., Wang P., Wang S., Yin  
681 S., Zhou G., Poland J.A., Bellgard M.I., Borisjuk L., Houben A., Doležel J., Ayling S.,  
682 Lonardi S., Kersey P., Langridge P., Muehlbauer G.J., Clark M.D., Caccamo M.,  
683 Schulman A.H., Mayer K.F.X., Platzer M., Close T.J., Scholz U., Hansson M., Zhang  
684 G., Braumann I., Spannagl M., Li C., Waugh R. & Stein N. (2017) A chromosome  
685 conformation capture ordered sequence of the barley genome. *Nature*, **544**, 427-433.
- 686 Mascher M., Richmond T.A., Gerhardt D.J., Himmelbach A., Clissold L., Sampath D., Ayling  
687 S., Steuernagel B., Pfeifer M., D'Ascenzo M., Akhunov E.D., Hedley P.E., Gonzales  
688 A.M., Morrell P.L., Kilian B., Blattner F.R., Scholz U., Mayer K.F.X., Flavell A.J.,

- 689 Muehlbauer G.J., Waugh R., Jeddelloh J.A. & Stein N. (2013) Barley whole exome  
690 capture: a tool for genomic research in the genus *Hordeum* and beyond. *Plant*  
691 *Journal*, **76**, 494-505.
- 692 Mudgil Y., Shiu S.H., Stone S.L., Salt J.N. & Goring D.R. (2004) A large complement of the  
693 predicted Arabidopsis ARM repeat proteins are members of the U-box E3 ubiquitin  
694 ligase family. *Plant Physiology*, **134**, 59-66.
- 695 Nelson B.K., Cai X. & Nebenfuhr A. (2007) A multicolored set of in vivo organelle markers for  
696 co-localization studies in Arabidopsis and other plants. *Plant Journal*, **51**, 1126-1136.
- 697 Nishimura K., Asakura Y., Friso G., Kim J., Oh S.H., Rutschow H., Ponnala L. & van Wijk  
698 K.J. (2013) ClpS1 Is a Conserved Substrate Selector for the Chloroplast Clp Protease  
699 System in Arabidopsis. *Plant Cell*, **25**, 2276-2301.
- 700 Nomura K., Mecey C., Lee Y.N., Imboden L.A., Chang J.H. & He S.Y. (2011) Effector-  
701 triggered immunity blocks pathogen degradation of an immunity-associated vesicle  
702 traffic regulator in Arabidopsis. *Proceedings of the National Academy of Sciences of*  
703 *the United States of America*, **108**, 10774-10779.
- 704 Oerke E.C. (2006) Crop losses to pests. *Journal of Agricultural Science*, **144**, 31-43.
- 705 Pandelova I., Figueroa M., Wilhelm L.J., Manning V.A., Mankaney A.N., Mockler T.C. &  
706 Ciuffetti L.M. (2012) Host-Selective Toxins of *Pyrenophora tritici-repentis* Induce  
707 Common Responses Associated with Host Susceptibility. *Plos One*, **7**.
- 708 Panstruga R. & Schulze-Lefert P. (2002) Live and let live: insights into powdery mildew  
709 disease and resistance. *Molecular Plant Pathology*, **3**, 495-502.
- 710 Park J.J., Yi J., Yoon J., Cho L.H., Ping J., Jeong H.J., Cho S.K., Kim W.T. & An G. (2011)  
711 OsPUB15, an E3 ubiquitin ligase, functions to reduce cellular oxidative stress during  
712 seedling establishment. *Plant Journal*, **65**, 194-205.
- 713 Pedersen C., van Themaat E.V.L., McGuffin L.J., Abbott J.C., Burgis T.A., Barton G.,  
714 Bindschedler L.V., Lu X.L., Maekawa T., Wessling R., Cramer R., Thordal-  
715 Christensen H., Panstruga R. & Spanu P.D. (2012) Structure and evolution of barley  
716 powdery mildew effector candidates. *Bmc Genomics*, **13**.

- 717 Pliego C., Nowara D., Bonciani G., Gheorghe D.M., Xu R., Surana P., Whigham E., Nettleton  
718 D., Bogdanove A.J., Wise R.P., Schweizer P., Bindschedler L.V. & Spanu P.D. (2013)  
719 Host-Induced Gene Silencing in Barley Powdery Mildew Reveals a Class of  
720 Ribonuclease-Like Effectors. *Molecular Plant-Microbe Interactions*, **26**, 633-642.
- 721 Rosebrock T.R., Zeng L.R., Brady J.J., Abramovitch R.B., Xiao F.M. & Martin G.B. (2007) A  
722 bacterial E3 ubiquitin ligase targets a host protein kinase to disrupt plant immunity.  
723 *Nature*, **448**, 370-U313.
- 724 Sadanandom A., Bailey M., Ewan R., Lee J. & Nelis S. (2012) The ubiquitin-proteasome  
725 system: central modifier of plant signalling. *New Phytologist*, **196**, 13-28.
- 726 Sarris P.F., Duxbury Z., Huh S.U., Ma Y., Segonzac C., Sklenar J., Derbyshire P., Cevik V.,  
727 Rallapalli G., Saucet S.B., Wirthmueller L., Menke F.L.H., Sohn K.H. & Jones J.D.G.  
728 (2015) A Plant Immune Receptor Detects Pathogen Effectors that Target WRKY  
729 Transcription Factors. *Cell*, **161**, 1089-1100.
- 730 Scholes J.D., Lee P.J., Horton P. & Lewis D.H. (1994) Invertase - Understanding Changes in  
731 the Photosynthetic and Carbohydrate-Metabolism of Barley Leaves Infected with  
732 Powdery Mildew. *New Phytologist*, **126**, 213-222.
- 733 Schulze-Lefert P. & Panstruga R. (2011) A molecular evolutionary concept connecting  
734 nonhost resistance, pathogen host range, and pathogen speciation. *Trends in Plant  
735 Science*, **16**, 117-125.
- 736 Schweizer P. (2007) Nonhost resistance of plants to powdery mildew - New opportunities to  
737 unravel the mystery. *Physiological and Molecular Plant Pathology*, **70**, 3-7.
- 738 Schweizer P., Gees R. & Mosinger E. (1993) Effect of Jasmonic Acid on the Interaction of  
739 Barley (*Hordeum-Vulgare* L) with the Powdery Mildew *Erysiphe-Graminis* F Sp  
740 *Hordei*. *Plant Physiology*, **102**, 503-511.
- 741 Schweizer P., Pokorny J., Abderhalden O. & Dudler R. (1999) A transient assay system for  
742 the functional assessment of defense-related genes in wheat. *Molecular Plant-  
743 Microbe Interactions*, **12**, 647-654.

- 744 Spallek T., Robatzek S. & Gohre V. (2009) How microbes utilize host ubiquitination. *Cellular*  
745 *Microbiology*, **11**, 1425-1434.
- 746 Spies A., Korzun L., Bayles R., Rajaraman J., Himmelbach A., Hedley P.E. & Schweizer P.  
747 (2012) Allele mining in barley genetic resources reveals genes of race-nonspecific  
748 powdery mildew resistance. *Frontiers in Plant Science, Plant-Microbe Interaction*, **2**.
- 749 Stegmann M., Anderson R.G., Ichimura K., Pecenkova T., Reuter P., Zarsky V., McDowell  
750 J.M., Shirasu K. & Trujillo M. (2012) The Ubiquitin Ligase PUB22 Targets a Subunit of  
751 the Exocyst Complex Required for PAMP-Triggered Responses in Arabidopsis. *Plant*  
752 *Cell*, **24**, 4703-4716.
- 753 Šurlan-Momirović G., Flath K., Silvar C., Branković G., Kopahnke D., Knežević D.,  
754 Schliephake E., Ordon F. & Perović D. (2016) Exploring the Serbian GenBank barley  
755 (*Hordeum vulgare* L. subsp. *vulgare*) collection for powdery mildew resistance.  
756 *Genetic Resources and Crop Evolution*, **63**, 275-287.
- 757 Thormahlen I., Meitzel T., Groysman J., Ochsner A.B., von Roepenack-Lahaye E., Naranjo  
758 B., Cejudo F.J. & Geigenberger P. (2015) Thioredoxin f1 and NADPH-Dependent  
759 Thioredoxin Reductase C Have Overlapping Functions in Regulating Photosynthetic  
760 Metabolism and Plant Growth in Response to Varying Light Conditions. *Plant Physiol*,  
761 **169**, 1766-1786.
- 762 Trujillo M. & Shirasu K. (2010) Ubiquitination in plant immunity. *Current Opinion in Plant*  
763 *Biology*, **13**, 402-408.
- 764 Vierstra R.D. (2009) The ubiquitin-26S proteasome system at the nexus of plant biology.  
765 *Nature Reviews Molecular Cell Biology*, **10**, 385-397.
- 766 Wang J., Qu B., Dou S., Li L., Yin D.D., Pang Z.Q., Zhou Z.Z., Tian M.M., Liu G.Z., Xie Q.,  
767 Tang D.Z., Chen X.W. & Zhu L. (2015) The E3 ligase OsPUB15 interacts with the  
768 receptor-like kinase PID2 and regulates plant cell death and innate immunity. *Bmc*  
769 *Plant Biology*, **15**.
- 770 Wang Q., Sullivan R.W., Kight A., Henry R.L., Huang J.R., Jones A.M. & Korth K.L. (2004)  
771 Deletion of the chloroplast-localized Thylakoid formation1 gene product in

- 772 Arabidopsis leads to deficient thylakoid formation and variegated leaves. *Plant*  
773 *Physiology*, **136**, 3594-3604.
- 774 Whigham E., Qi S., Mistry D., Surana P., Xu R., Fuerst G., Pliego C., Bindschedler L.V.,  
775 Spanu P.D., Dickerson J.A., Innes R.W., Nettleton D., Bogdanove A.J. & Wise R.P.  
776 (2015) Broadly Conserved Fungal Effector BEC1019 Suppresses Host Cell Death  
777 and Enhances Pathogen Virulence in Powdery Mildew of Barley (*Hordeum vulgare*  
778 L.). *Molecular Plant-Microbe Interactions*, **28**, 968-983.
- 779 Wicker T., Mayer K.F.X., Gundlach H., Martis M., Steuernagel B., Scholz U., Simkova H.,  
780 Kubalaková M., Choulet F., Taudien S., Platzer M., Feuillet C., Fahima T., Budak H.,  
781 Dolezel J., Keller B. & Stein N. (2011) Frequent Gene Movement and Pseudogene  
782 Evolution Is Common to the Large and Complex Genomes of Wheat, Barley, and  
783 Their Relatives. *Plant Cell*, **23**, 1706-1718.
- 784 Woodson J.D., Joens M.S., Sinson A.B., Gilkerson J., Salom P.A., Weigel D., Fitzpatrick J.A.  
785 & Chory J. (2015) Ubiquitin facilitates a quality-control pathway that removes  
786 damaged chloroplasts. *Science*, **350**, 450-454.
- 787 Yamatani H., Sato Y., Masuda Y., Kato Y., Morita R., Fukunaga K., Nagamura Y., Nishimura  
788 M., Sakamoto W., Tanaka A. & Kusaba M. (2013) NYC4, the rice ortholog of  
789 Arabidopsis THF1, is involved in the degradation of chlorophyll protein complexes  
790 during leaf senescence. *Plant Journal*, **74**, 652-662.
- 791 Zeng L.R., Park C.H., Venu R.C., Gough J. & Wang G.L. (2008) Classification, expression  
792 pattern, and E3 ligase activity assay of rice U-box-containing proteins. *Molecular*  
793 *Plant*, **1**, 800-815.
- 794 Zhou J., Lu D., Xu G., Finlayson S.A., He P. & Shan L. (2015) The dominant negative ARM  
795 domain uncovers multiple functions of PUB13 in Arabidopsis immunity, flowering, and  
796 senescence. *J Exp Bot*, **66**, 3353-3366.
- 797 Zimmermann G., Baumlein H., Mock H.P., Himmelbach A. & Schweizer P. (2006) The  
798 multigene family encoding germin-like proteins of barley. Regulation and function in  
799 basal host resistance. *Plant Physiology*, **142**, 181-192.

800

801

802 **TABLES**

803

804 **Table 1:** Sequence overview of *HvPUB15* and its partial duplicate *HvARM1* in the barley

805 genome.

| Identifier                                                              | <i>HvPUB15</i>   | <i>HvARM1</i>    |
|-------------------------------------------------------------------------|------------------|------------------|
| cDNA clone ID                                                           | HO23D08          | HO14H18          |
| HarvEST assembly #35 unigene Nr.                                        | 3072             | 3071             |
| Full-coding sequence cDNA Acc. Nr.                                      | AK361754         | AK371875         |
| Morex WGS contig Acc. Nr. <sup>a</sup>                                  | CAJW010005672    | CAJX010121345    |
| Barke WGS contig Acc. Nr. <sup>a</sup>                                  | CAJV010187631    | CAJV010188692    |
| Bowman WGS contig Acc. Nr. <sup>a</sup>                                 | CAJX010851782    | CAJX010121345    |
| High confidence barley gene ID <sup>a</sup>                             | HORVU3Hr1G113910 | HORVU3Hr1G081380 |
| Chromosome <sup>b</sup>                                                 | 3HL              | 3HL              |
| Position (Mbp) <sup>b</sup>                                             | 689,57           | 594,73           |
| Syntenic to <i>B.distachyon</i> , <i>O.sativa</i> ,<br><i>S.bicolor</i> | No               | No               |
| Syntenic to <i>A. tauschii</i>                                          | Yes              | No               |

806

807 <sup>a</sup>Most significant BlastN result with 99-100% identity to genomic sequence of barley

808 (<http://webblast.ipk-gatersleben.de/barley/>).

809 <sup>b</sup>Based on high-confidence (HC)-gene mapping of the barley reference sequence (Mascher

810 *et al.*, 2017).

811

812 **Table 2:** Marker-trait associations of *HvARM1* and *HvPUB15* in diverse collections of  
 813 cultivated *H. vulgare* ssp. *vulgare*.  
 814

| <b>Gene</b> | <b>Population<sup>a</sup></b> | <b>Trait<sup>b</sup></b> | <b>Marker<sup>c</sup></b> | <b>minus<br/>log(p)<sup>d</sup></b> | <b>Holm<br/>corr. p<sup>e</sup></b> |
|-------------|-------------------------------|--------------------------|---------------------------|-------------------------------------|-------------------------------------|
| HvARM1      | WHEALBI_LRC                   | PM_max_2_isol rel_Rol    | H02                       | 2,893                               | <b>0,0051</b>                       |
| HvARM1      | WHEALBI_LRC                   | PM_max_2_isol rel_MRX    | H02                       | 2,848                               | <b>0,0057</b>                       |
| HvARM1      | WHEALBI_LRC                   | PM_JKI_75_rel_MRX        | H02                       | 2,418                               | <b>0,0153</b>                       |
| HvARM1      | WHEALBI_LRC                   | PM_max_2_isol rel_Rol    | S3H_594732776             | 2,893                               | <b>0,0051</b>                       |
| HvARM1      | WHEALBI_LRC                   | PM_max_2_isol rel_MRX    | S3H_594732776             | 2,848                               | <b>0,0057</b>                       |
| HvARM1      | WHEALBI_LRC                   | PM_JKI_75_rel_MRX        | S3H_594732776             | 2,418                               | <b>0,0153</b>                       |
| HvARM1      | WHEALBI_CULT                  | PM_JKI_75_rel_Rol        | S3H_594731277             | 3,826                               | <b>0,0006</b>                       |
| HvARM1      | WHEALBI_CULT                  | PM_JKI_75_rel_MRX        | S3H_594731277             | 3,460                               | <b>0,0014</b>                       |
| HvARM1      | WHEALBI_CULT                  | PM_max_2_isol rel_MRX    | S3H_594731277             | 3,374                               | <b>0,0017</b>                       |
| HvARM1      | WHEALBI_CULT                  | PM_JKI_75_rel_Rol        | H01                       | 3,826                               | <b>0,0004</b>                       |
| HvARM1      | WHEALBI_CULT                  | PM_JKI_75_rel_MRX        | H01                       | 3,460                               | <b>0,0010</b>                       |
| HvARM1      | WHEALBI_CULT                  | PM_max_2_isol rel_MRX    | H01                       | 3,374                               | <b>0,0013</b>                       |
| HvPUB15     | WHEALBI_LRC                   | PM_JKI_242_rel_Rol       | H10                       | 0,871                               | 0,5379                              |
| HvPUB15     | WHEALBI_LRC                   | PM_JKI_242_rel_Rol       | H11                       | 0,684                               | 0,6203                              |
| HvPUB15     | WHEALBI_LRC                   | PM_max_2_isol rel_MRX    | H10                       | 0,599                               | 1                                   |
| HvPUB15     | WHEALBI_LRC                   | PM_JKI_242_rel_Rol       | S3H_689574119             | 0,814                               | 1                                   |
| HvPUB15     | WHEALBI_LRC                   | PM_JKI_242_rel_Rol       | S3H_689574678             | 0,814                               | 1                                   |
| HvPUB15     | WHEALBI_LRC                   | PM_JKI_242_rel_Rol       | S3H_689575062             | 0,814                               | 1                                   |
| HvPUB15     | WHEALBI_CULT                  | PM_max_2_isol rel_Rol    | S3H_689573944             | 1,055                               | 1                                   |
| HvPUB15     | WHEALBI_CULT                  | PM_JKI_75_rel_Rol        | S3H_689573944             | 1,002                               | 1                                   |
| HvPUB15     | WHEALBI_CULT                  | PM_JKI_75_rel_MRX        | S3H_689573776             | 0,925                               | 1                                   |
| HvPUB15     | WHEALBI_CULT                  | PM_JKI_75_rel_MRX        | H10                       | 0,511                               | 0,926                               |
| HvPUB15     | WHEALBI_CULT                  | PM_max_2_isol rel_MRX    | H10                       | 0,372                               | 1                                   |
| HvPUB15     | WHEALBI_CULT                  | PM_max_2_isol rel_Rol    | H11                       | 0,359                               | 1                                   |

815



816 <sup>a</sup>CULT, cultivars; LRC, landraces.

817 <sup>b</sup>Three different powdery mildew (PM) traits were recorded: (1) infection caused by isolate  
818 JKI\_75 relative to internal reference genotypes Morex (MRX) or Roland (Rol); (2) infection  
819 caused by isolate JKI\_242 relative to MRX or Rol; (3) Maximum infection caused by either  
820 isolate relative to MRX or Rol.

821 <sup>c</sup>Per population and gene the three most significant haplotype-trait as well as SNP-trait  
822 associations are shown; H, haplotype; S, SNP.

823 <sup>d</sup>Negative log(10) of p value for the null hypothesis of a marker-trait association.

824 <sup>e</sup>Values >1 of multiple-testing corrected p-values are replaced by 1; number of SNP or  
825 haplotypes per gene = number of tests.

826

827 **Table 3:** Reduced nonhost resistance of *HvARM1*-silenced transgenic *H. vulgare* plants  
828 against *B. graminis* f.sp. *tritici*.

829

| Genotype <sup>a</sup>             | Colonies/leaf segment <sup>b</sup> | N <sup>c</sup> | p-value <sup>d</sup> |
|-----------------------------------|------------------------------------|----------------|----------------------|
| Wildtype (G. Promise)             | 0.380 ± 0.307                      | 25             | <0.0001              |
| Azygous control                   | 3.332 ± 0.686                      | 78             |                      |
| BG107/2E01-Line-3                 | 4.153 ± 1.010                      | 37             | 0.2518               |
| BG94/3E05-Line-15&20 <sup>e</sup> | 17.510 ± 7.582                     | 47             | 0.0345               |
| BG107/2E09-Line-13                | 16.310 ± 7.067                     | 28             | 0.0392               |

830

831 <sup>a</sup>Transgenic- and null-segregant plants are from the T3 generation.

832 <sup>b</sup>Microcolonies were counted 7 days after inoculation under the light microscope. Total  
833 number of colonies per leaf segments that were cut to the same length. Mean values ± SEM.

834 <sup>c</sup>Number of leaf segments (plants).

835 <sup>d</sup>t-test (1-tailed) against the azygous control, asking for enhanced colony number.

836 <sup>e</sup>Data from T3 progeny of two T2 sister lines were pooled in order to reach a sufficiently large  
837 number of tested individuals.

**Table 4:** Effect of TIGS and transient over-expression of *HvARM1* and genes encoding its interacting proteins on QR against *B. graminis* f.sp. *hordei*.

| Bombarded gene                | Proposed function                          | TIGS                        |                         |          | Transient OEX               |                         |           |
|-------------------------------|--------------------------------------------|-----------------------------|-------------------------|----------|-----------------------------|-------------------------|-----------|
|                               |                                            | Rel. SI (log2) <sup>a</sup> | p (t-test) <sup>b</sup> | n        | Rel. SI (log2) <sup>c</sup> | p (t-test) <sup>b</sup> | n         |
| HORVU3Hr1G113910              | U-box/ARM E3 protein ligase (HvPUB15)      | 0.17 ± 0.41                 | 0.6950                  | 5        | 0.26 ± 0.19                 | 0.2316                  | 7         |
| HORVU3Hr1G081380              | ARM-repeat protein (HvARM1)                | <b>1.16 ± 0.22</b>          | <b>0.0126</b>           | <b>4</b> | -0.01 ± 0.21                | 0.9516                  | 5         |
| HORVU3Hr1G117760              | DNAj                                       | 0.004 ± 0.41                | 0.9927                  | 5        |                             |                         |           |
| HORVU2Hr1G041260              | Thylakoid-formation 1 (Thf1)               | -1.35 ± 0.59                | 0.0689                  | 6        | <b>0.47 ± 12.1</b>          | <b>0.0035</b>           | <b>6</b>  |
| HORVU7Hr1G020580              | Cadmium tolerant protease                  | -0.19 ± 0.35                | 0.6190                  | 5        |                             |                         |           |
| HORVU2Hr1G080670              | Dynein ligh-chain protein                  | -0.30 ± 0.42                | 0.5232                  | 5        |                             |                         |           |
| HORVU3Hr1G059130              | Serine/threonine kinase                    | -0.85 ± 0.63                | 0.2461                  | 5        |                             |                         |           |
| HORVU2Hr1G003460              | ATP-dependent Clp-protease adaptor (ClpS1) | -0.60 ± 0.41                | 0.2168                  | 5        | <b>0.70 ± 0.06</b>          | <b>8.43E-5</b>          | <b>6</b>  |
| HORVU7Hr1G008760 <sup>d</sup> | Syntaxin HvSNAP34                          | <b>1.14 ± 0.25</b>          | <b>0.0050</b>           | <b>5</b> |                             |                         |           |
| TaPrx103 <sup>e</sup>         | Class III peroxidase TaPrx103              |                             |                         |          | <b>-1.06 ± 0.15</b>         | <b>6.61E-6</b>          | <b>14</b> |

<sup>a</sup>Relative to the pIPKTA30 internal empty vector control.

<sup>b</sup>One-sample t-test (2-tailed) of log2-transformed relative SI against the hypothetical value “0”.

<sup>c</sup>Relative to the pIPKTA09 internal empty vector control.

<sup>d</sup>TIGS of this target gene enhances susceptibility to *Bgh* and served as positive control (Douchkov *et al.*, 2005).

<sup>e</sup>Transient or stable overexpression of this gene enhances resistance in barley and wheat against *B. graminis* and served as positive control (Schweizer *et al.*, 1999).

Statistically significant effects are highlighted in bold.

**Table 5:** Transient over-expression of *HvARM1* enhances resistance in *T. aestivum* against *B. graminis* f.sp. *tritici*.

| Bombarded gene            | Relative SI (log2) <sup>a</sup> | p (t-test) <sup>b</sup> | n <sup>c</sup> |
|---------------------------|---------------------------------|-------------------------|----------------|
| HvARM1                    | -0.37 ± 0.12                    | 0.0107                  | 16             |
| HvARM1(-ATG) <sup>d</sup> | 0.19 ± 0.13                     | 0.2168                  | 5              |

<sup>a</sup>Susceptibility index, normalized to the empty-vector control pIPKTA09 and log2-transformed.

<sup>b</sup>One-sample t-test (2-tailed) of log2-transformed relative SI against the hypothetical value "0".

<sup>c</sup>Number of independent bombardment experiments.

<sup>d</sup>Negative control construct without translation start codon.

## FIGURE LEGENDS

**Figure 1:** Asexual life cycle of *Blumeria graminis* and the assessment of fungal development in barley (*Hordeum vulgare*) and wheat (*Triticum aestivum*).

For transient-induced gene silencing (TIGS) and for transient over-expression (OEX), initial haustorium (feeding cell) formation in transformed, GUS-expressing epidermal cells of barley or wheat is completed 1 day after inoculation (dai) and was assessed under the microscope 40 h after inoculation. For the characterization of transgenic plants, early developing colonies were stained, counted and normalized to the analysed leaf area at 2 dai. The asexual life cycle is completed by the appearance of macroscopically visible, sporulating colonies (pustules) 5-7 dai, which can be estimated or quantified as percentage of pustule-covered leaf area.

**Figure 2:** A partial duplication of the E3 ligase gene *PUB15* in *Triticeae* species gave rise to *ARM1*.

**(a)** Schematic view of the genomic structure of HvPUB15 and its partial duplicate HvARM1. Red boxes and blue lines represent exon and intron sequences, respectively. The region of high sequence homology is indicated by light gray shading. **(b)** DNA-sequence alignment around the translational start of *ARM1* from *Triticeae* species. The two proposed translation start sites of *ARM1* are inside the red frames. Percent sequence identity per nucleotide is indicated by grey shading (black, 100% identity). Acc-Nr: *AetARM1*, XM\_020296982; *HvARM1*, AK371875; *ScARM1*, KM881628; *TuARM1*, AOTI010733077; *AetPUB15*, XM\_020311842; *HvPUB15*, AK361754; *ScPUB15*, KM881629; *TuPUB15*, AOTI010384858. **(c)** Protein sequence alignment of PUB15 and ARM1 at the N-terminus of ARM1. Acc. Nr: *AetARM1*, EMT05611; *HvARM1*, BAK03073; *ScARM1*, KM881628; *TuARM1*, EMS55038; *AetPUB15*, EMT16948; *HvPUB15*, BAJ92958; *ScPUB15*, KM881629; *TuPUB15*, EMS61710. **(d)** Phylogenetic trees of PUB15 protein sequences based on alignment from the N-terminus to the start of the overlapping part with ARM1, and of both proteins based on alignment of

overlapping PUB15 and ARM1 sequences. A neighbour-joining tree without pre-determined outgroup was calculated, and bootstrap values (in percent) based on 1000 re-iterations plus tree depth (in changes per amino-acid position) are indicated by numbers and scale bar, respectively. **(e)** Conservative selection at the armadillo-repeat domain of *ARM1* among *Triticeae* species. The ratio of non-synonymous to synonymous nucleotide exchanges (Ka/Ks) among *PUB15* and *ARM1* genes of four *Triticeae* species was calculated in a stepwise sliding window of 120 nucleotides. Deviation of the mean Ka/Ks ratios of all six pairwise species comparisons from the null-hypothetical value “1” was tested by t-test. NS, not significantly different from 1 (  $p > 0.01$ , 2-tailed). **(a-e)** Species binomial abbreviations: *Aet*, *Aegilops tauschii* (wild wheat); *Hv*, *Hordeum vulgare* (barley); *Sc*, *Secale cereale* (rye), *Ta*, *Triticum aestivum* (wheat).

**Figure 3:** Silencing of *HvARM1* and *HvPUB15* in *H. vulgare* affects quantitative resistance against *B. graminis* f. sp. *hordei*.

**(a)** Transcript abundance of the *HvARM1* target gene and its possible off-target *HvPUB15* was determined by RT-qPCR in RNA from leaves of non-inoculated plants. Normalized transcript abundance relative to the *HvUBC* reference gene encoding an E2 ubiquitin conjugating enzyme (see “Materials and Methods”) was further normalized to the mean value of azygous segregants (set to “1”). Single T2-plant-derived T3 sister lines are indicated by small letters a or b. Mean values  $\pm$  SE from 3 biological replicates (batches of plants sown on different dates) are shown. **(b)** Detached second leaves of T3 transgenic barley RNAi plants were inoculated with *Bgh* and infection was assessed microscopically 48 hours after inoculation. Data represent normalized colony density (number/cm<sup>2</sup>/median of azygous control per experiment)  $\pm$  SE from 2-3 biological replications. Differences between transgenic events and azygous plants are indicated by asterisks. \*,  $p < 0.05$ ; \*\*\*,  $p < 0.0005$  (student’s t-test; two-tailed). **(c)** Growth phenotypes of *HvARM1*-silenced transgenic seedlings from event BG94/3E06 exhibiting more severe seedling lethality (not used for *Bgh*-interaction phenotyping in T3 generation) and of adult plants from event BG107/2E01 that was used for

*Bgh*-resistance tests. Plant numbers 1, 2 and 3 show examples of seedlings with lethal, growth-retarded and wildtype-like growth phenotypes.

**Figure 4:** Proteins of *H. vulgare* interacting with HvARM1 and HvPUB15 in the yeast-two-hybrid system (Y2H).

**(a)** Full-length HvARM1 was used as bait in a Y2H screening of a cDNA library derived from *Bgh*-attacked barley leaves. Growth of yeast on SD-Leu/-Trp confirms the presence of both bait and prey vectors for protein expression. Growth on SD-Leu/-Trp/-His/-Ade indicates protein-protein interaction. No growth of empty bait vector + candidate prey confirms the absence of autoactivation of any prey construct for six final candidates. **(b)** Two of the six candidate protein interactors of HvARM1 also interact with full-length HvPUB15.

**Figure 5:** Bimolecular functional complementation (BiFC) of YFP by *H. vulgare* proteins interacting with HvARM1 and HvPUB15 *in vivo*.

BiFC by HvPUB15- and HvARM1-interacting proteins in *N. benthamiana* leaves after infiltration of *A. tumefaciens* strains carrying the protein interaction partners fused C-terminally to split halves of YFP. BF, bright field; -SP, with deleted N-terminal plastid import signal; VenN, N-terminal half of the stabilized YFP version “Venus”; VenC, C-terminal half of the YFP “Venus”. Scale bars, 20  $\mu$ m.

**Figure 6:** Co-immunoprecipitation (Co-IP) of *H. vulgare* proteins interacting with HvARM1 and HvPUB15 *in vivo*.

Co-IP of antibody-tagged barley proteins in *A. thaliana* mesophyll protoplasts. YFP-fused *HvARM1* and *HvPUB15* were co-expressed with cMyc-tagged HvThf1 and *HvClpS1*, respectively for each interaction. Co-IP was performed using anti-YFP antibodies and total proteins extracted from *A. thaliana* protoplasts.

**Figure 7:** Degradation of HvThf1:YFP by over-expression of HvPUB15.

The numbers of HvThf1:YFP- or HvClpS1:YFP-expressing epidermal cells was determined in transient co-expression experiments in presence or absence of HvPUB15 or HvARM1. Data represents  $\log_2$ -transformed values normalized to the empty-vector control. Bars indicates mean  $\pm$  SEM of 3-4 independent bombardment series; P values for the null hypothesis are indicated (one sample t-test, two tailed).

**Figure 8:** Genome-wide search for expressed, partial gene duplicates.

**(a)** Transcript regulation in peeled barley leaf epidermis by Bgh (host) or Bgt (nonhost). Total RNA was isolated at the time indicated after inoculation and subjected to hybridization to the Barley Gene Expression Array of Agilent. For the link of full-length cDNA accession No. to Agilent probe IDs, see supporting Table S2. Transcript data have been submitted to ArrayExpress (Acc. E-MTAB-2916). Hierarchical clustering of gene-median-centered, normalized signal intensities is shown. The color scale ranges from  $\log(2)$ -1.5 to 1.5. Mean signal intensities from three independent inoculation experiments are shown. **(b)** cDNA Alignment example of a DUF4228 protein and its proposed partial duplicate. **(c)** Protein alignment of the translated sequences of cDNAs shown in (b). Red and violet bars indicate the DUF4228 domain and a perfect repeat of a highly hydrophilic protein motif, respectively.

**Figure 9:** Model of the HvThf1-related functions of HvARM1 and HvPUB15 in powdery-mildew attacked *H. vulgare*.

The model is centered on the proposed susceptibility factor HvThf1 for *Bgh*. The Thf1 protein has been proposed as target to the necrotrophic toxin A of *P. tritici-repentis* (Ptr ToxA). The question mark relates to the open possibilities that HvARM1 either directly affects the susceptibility-related function of HvThf1 by binding to it, or that it protects HvPUB15 from putative *Bgh* effector attack.



## FIGURES

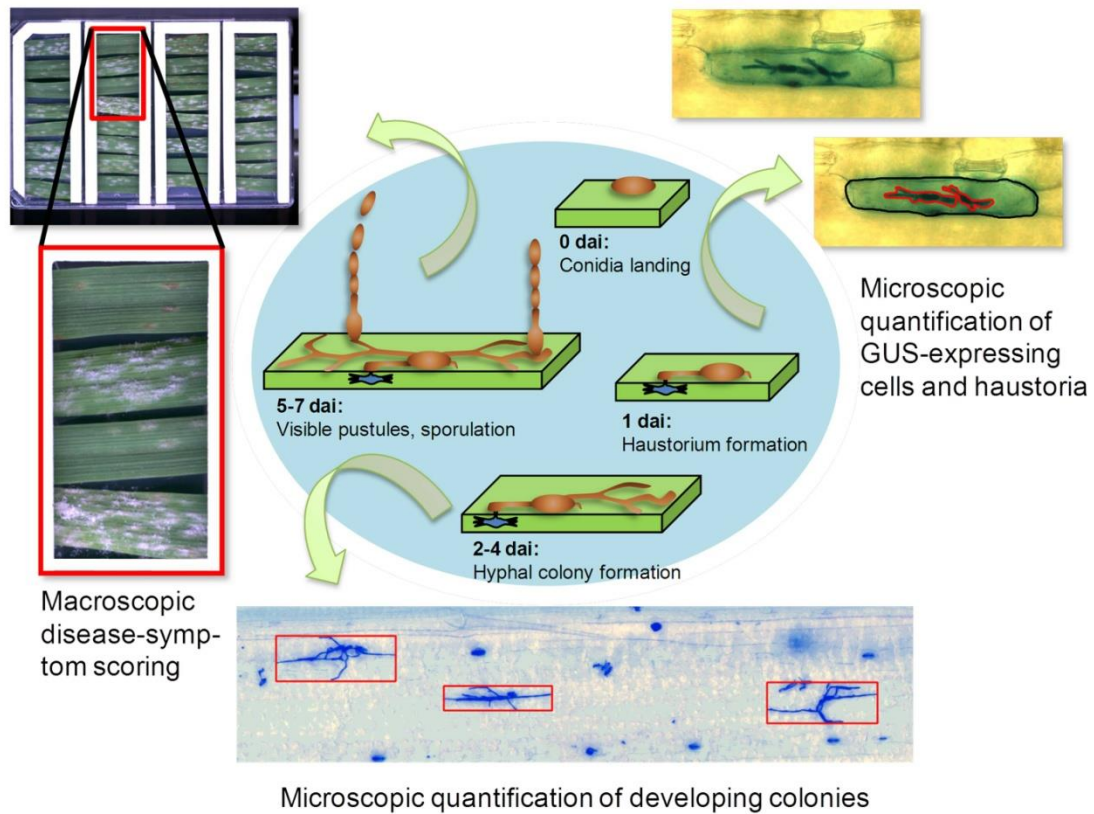

**Figure 1:** Asexual life cycle of *Blumeria gramininis* and assessment of fungal development in barley (*Hordeum vulgare*) and wheat (*Triticum aestivum*).

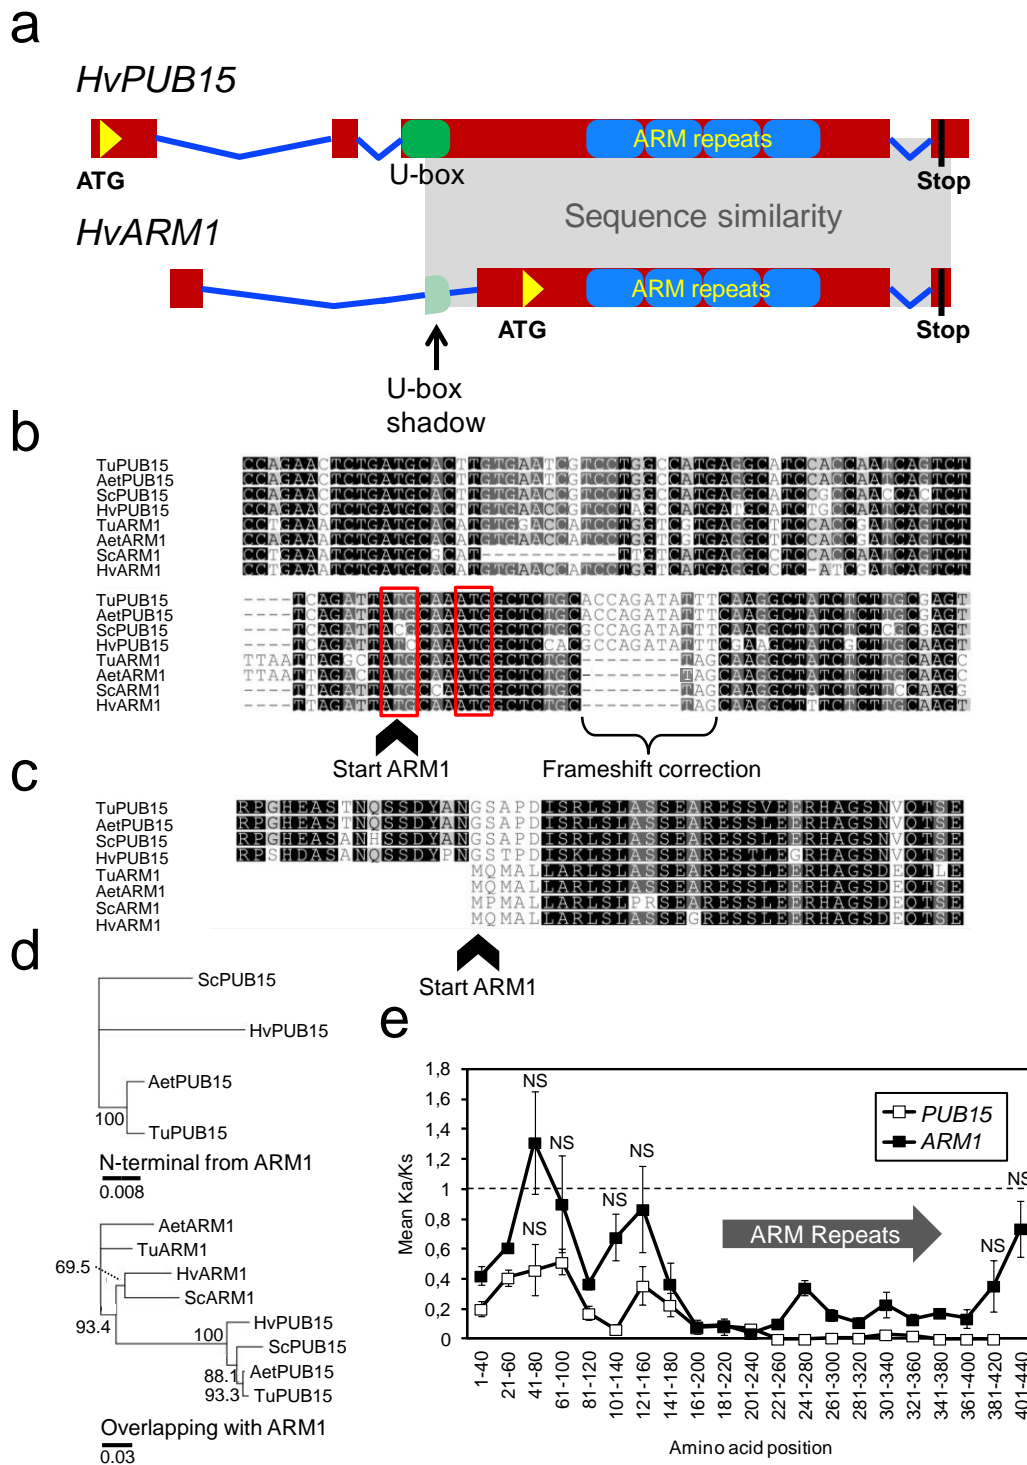

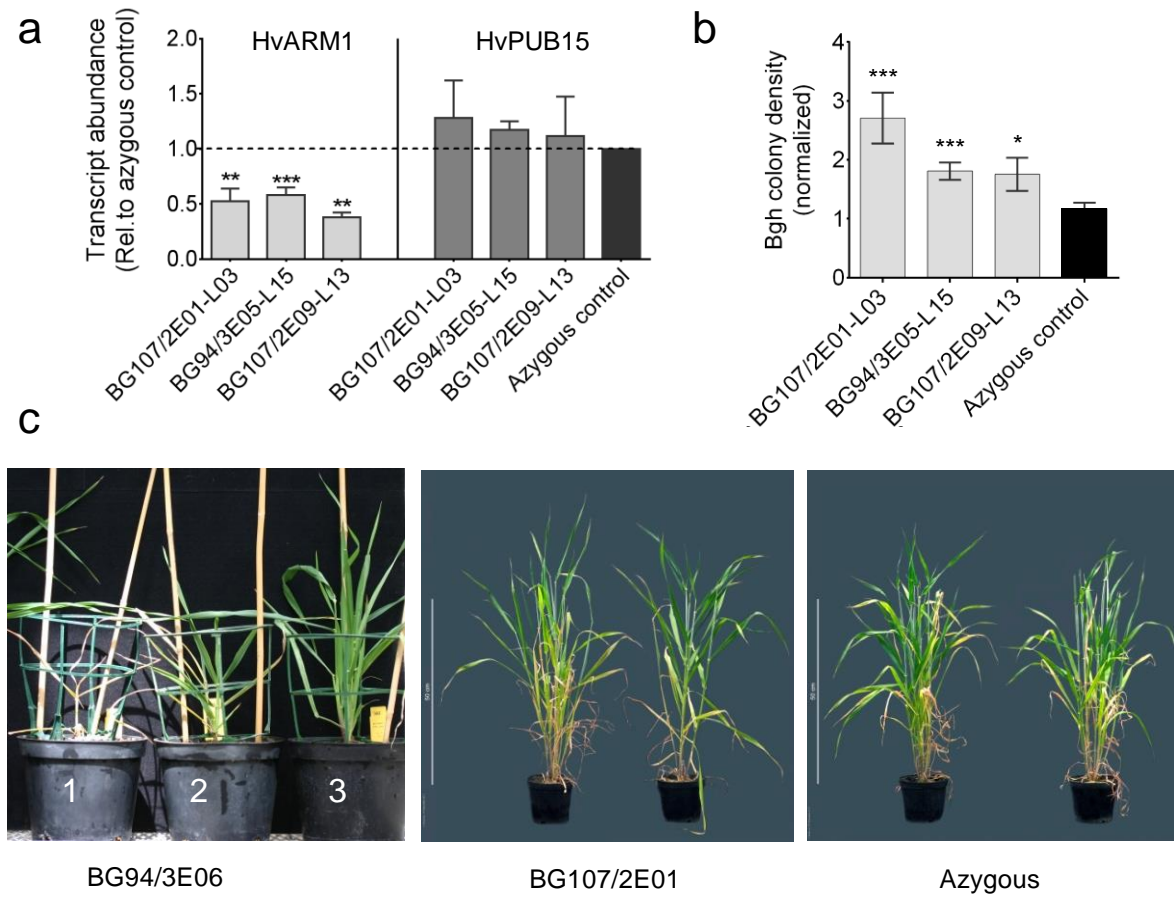

**Figure 3:** Silencing of *HvARM1* and *HvPUB15* in *H. vulgare* affects quantitative resistance against *B. graminis* f. sp. *hordei*.

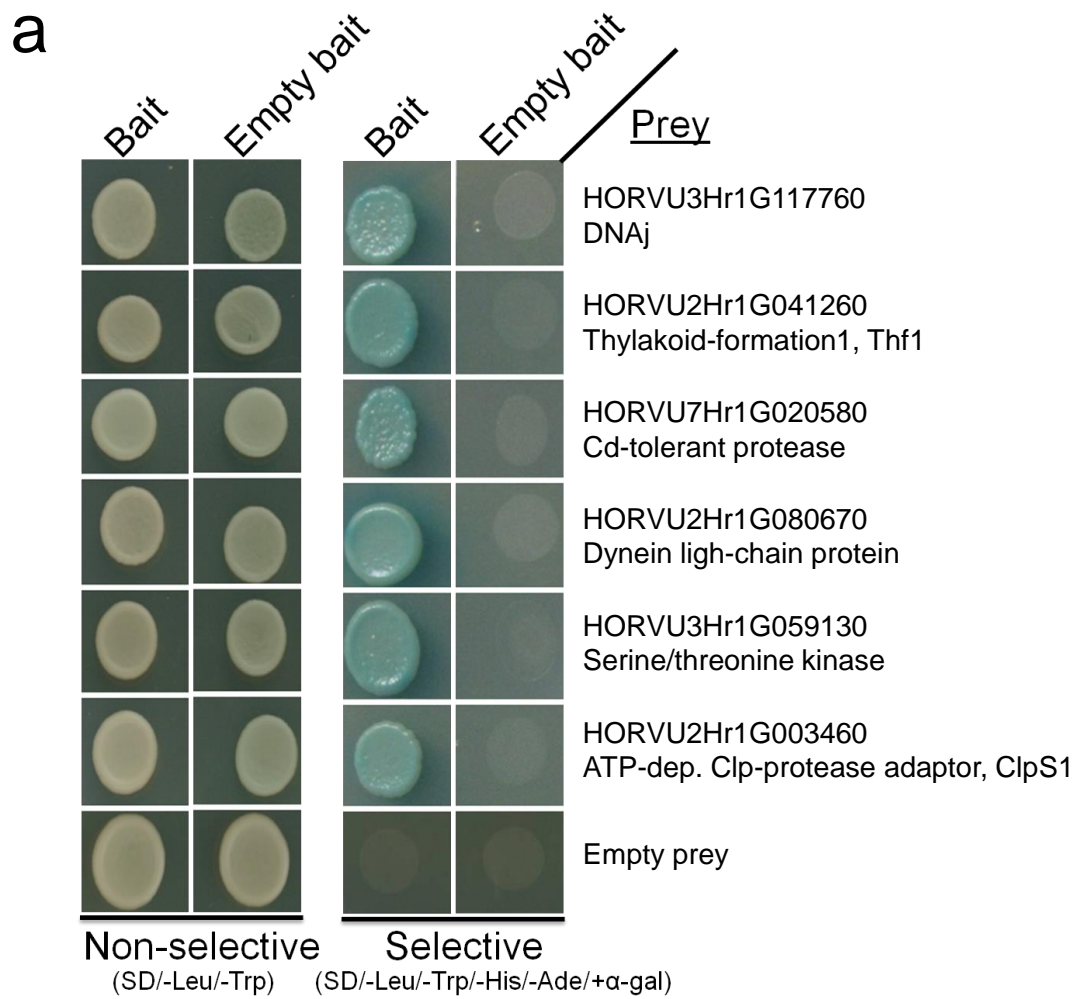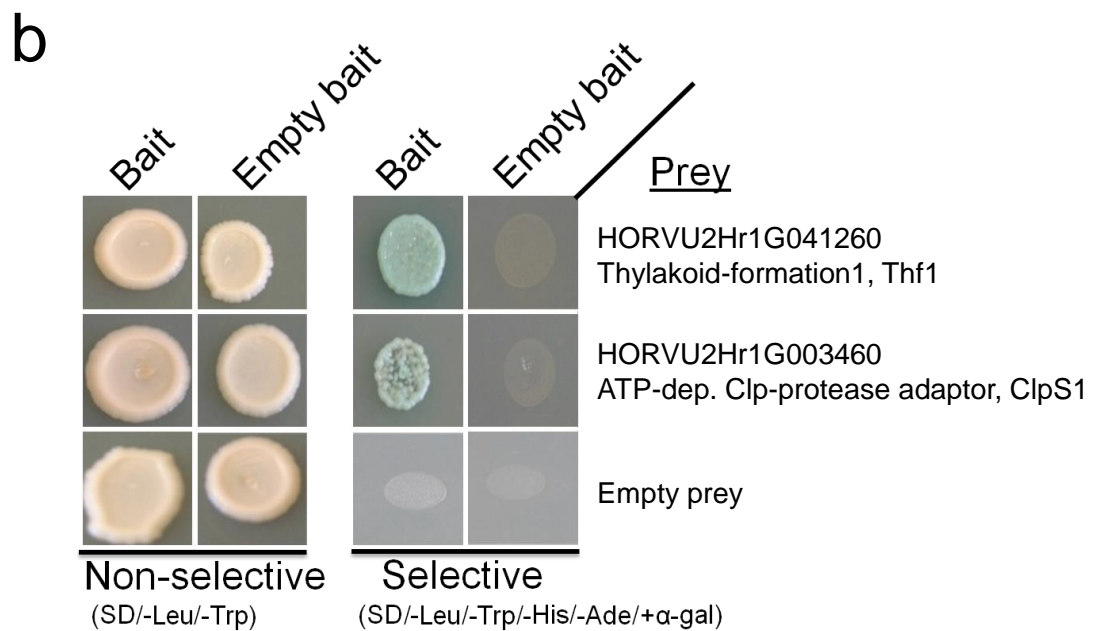

**Figure 4:** Proteins of *H. vulgare* interacting with HvARM1 and HvPUB15 in the yeast-two-hybrid system (Y2H).

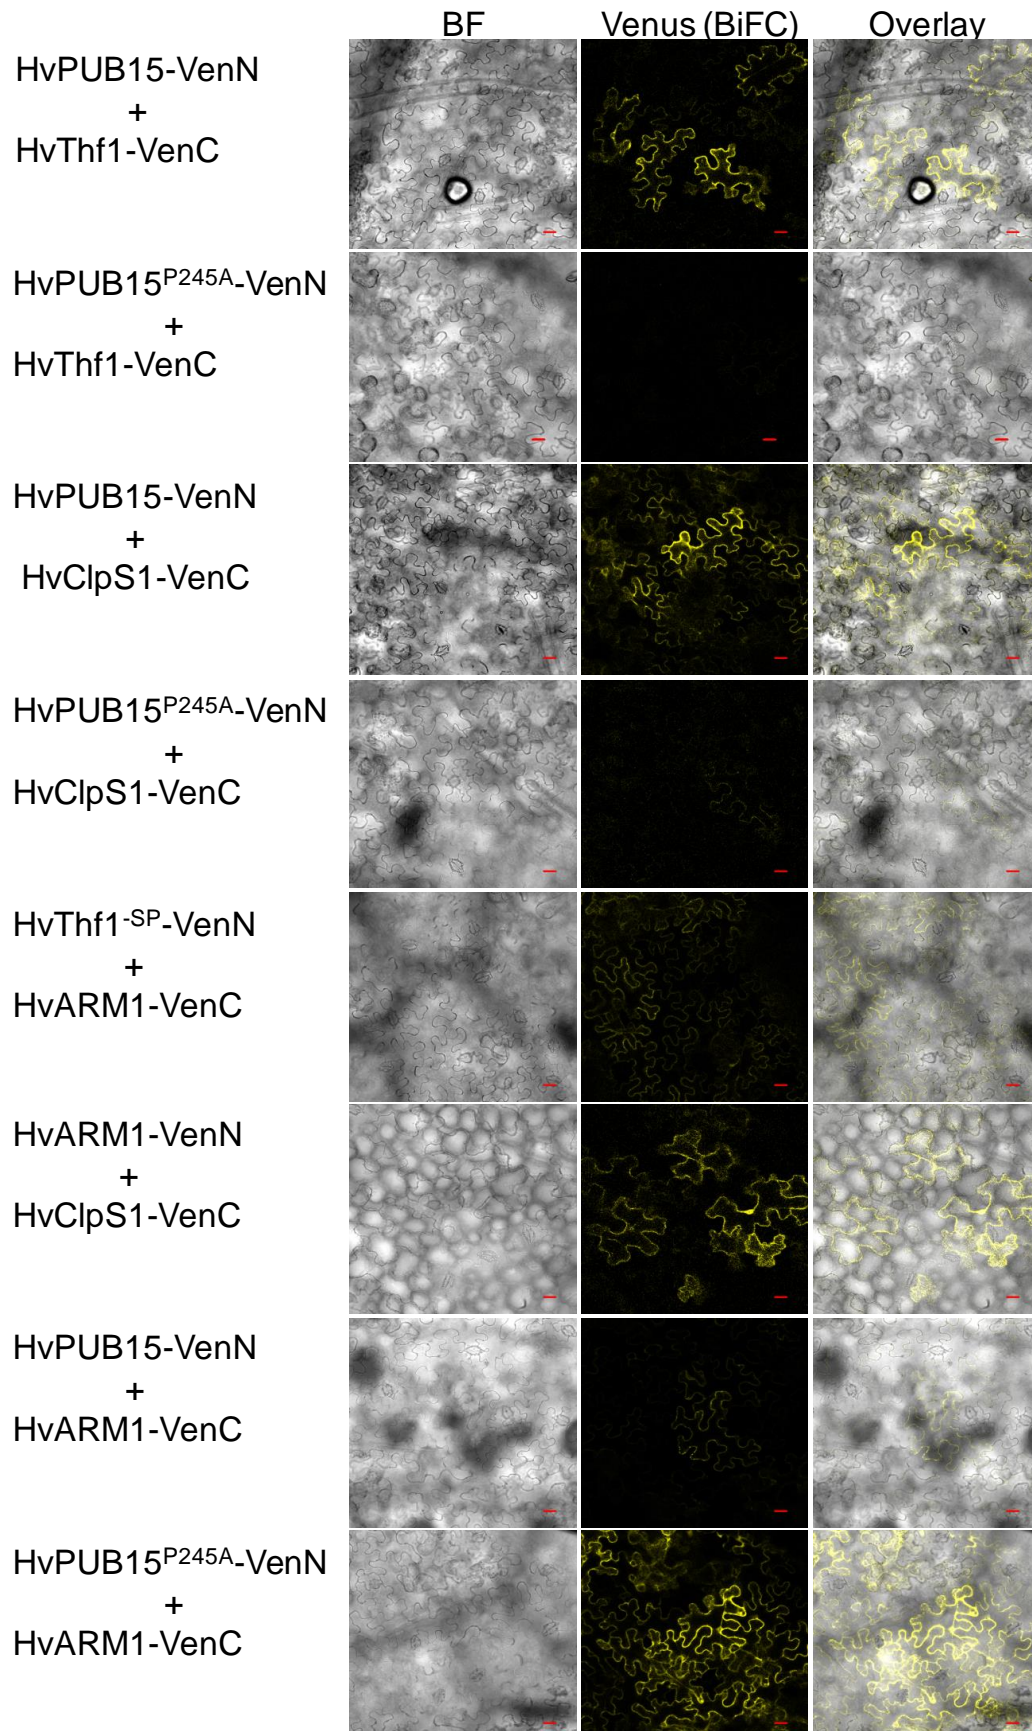

**Figure 5:** Bimolecular functional complementation (BiFC) of YFP by *H. vulgare* proteins interacting with HvARM1 and HvPUB15 *in vivo*.

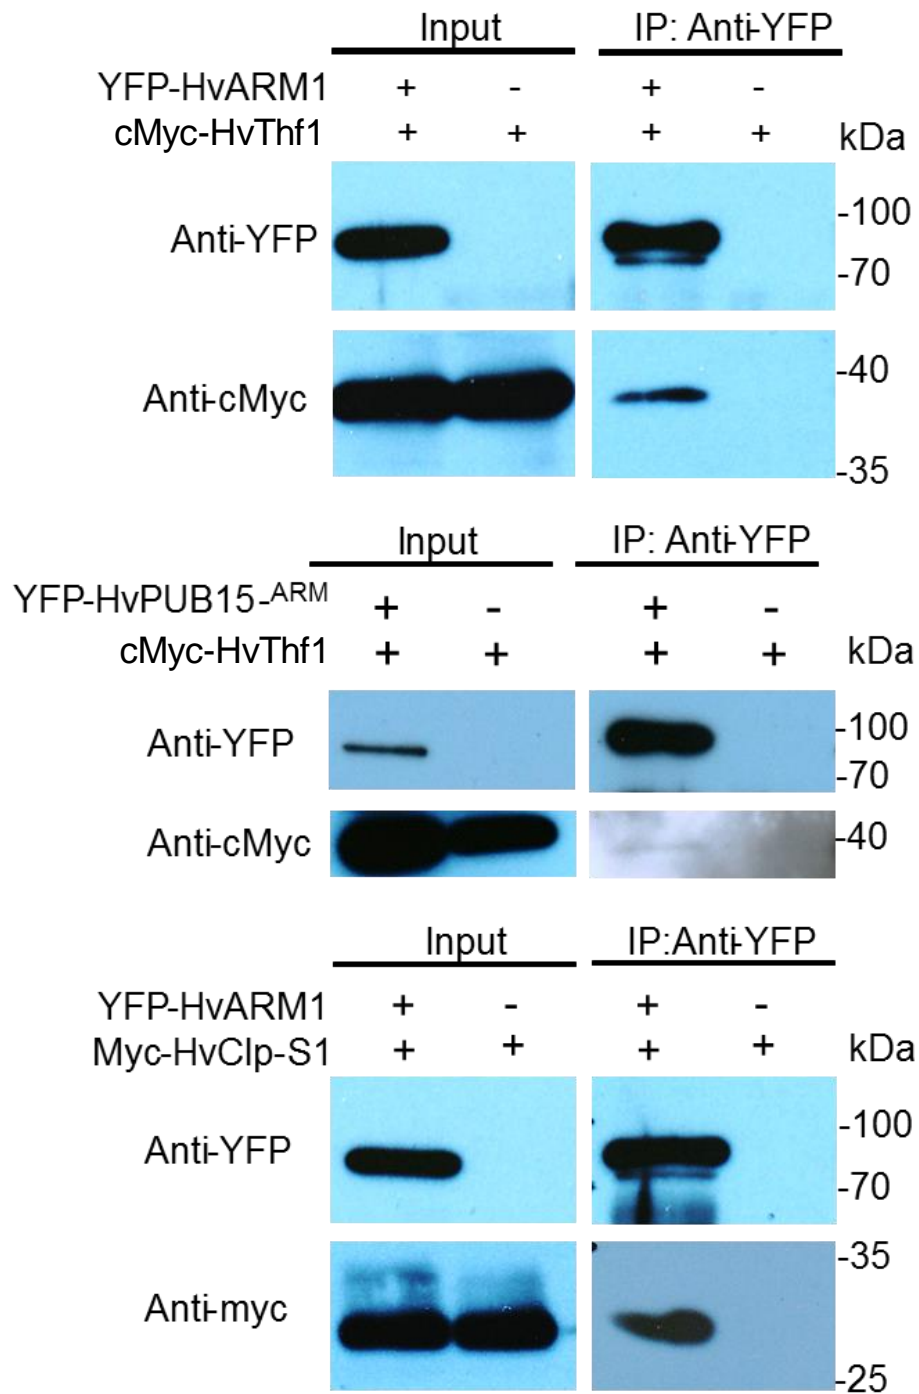

**Figure 6:** Co-immunoprecipitation (Co-IP) of *H. vulgare* proteins interacting with HvARM1 and HvPUB15 *in vivo*.

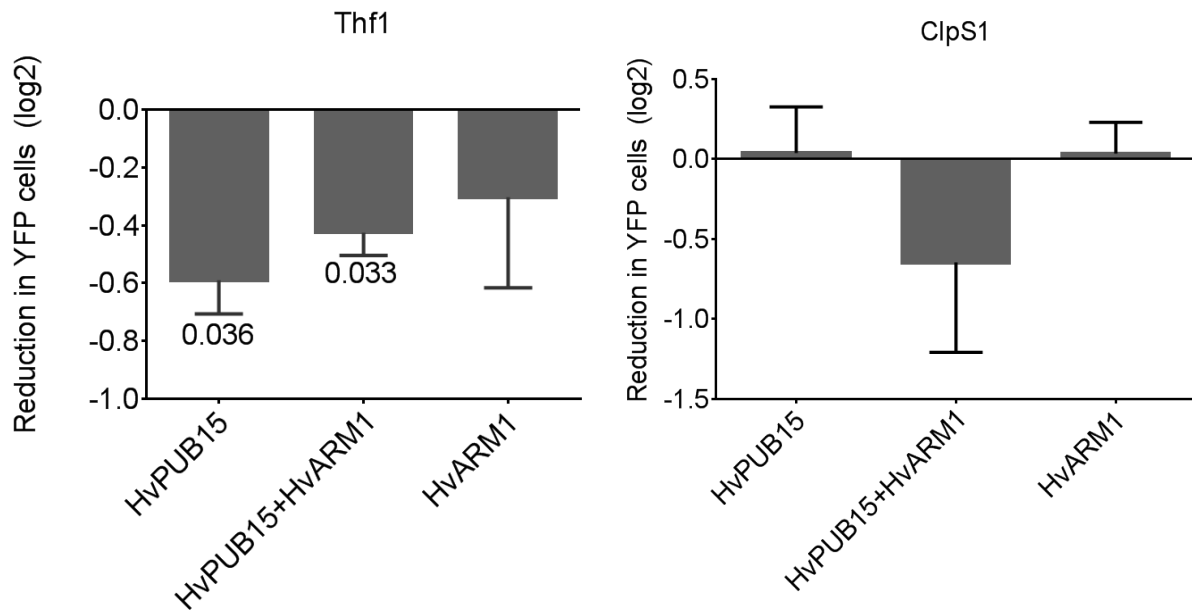

**Figure 7:** Degradation of HvThf1:YFP by over-expression of HvPUB15.

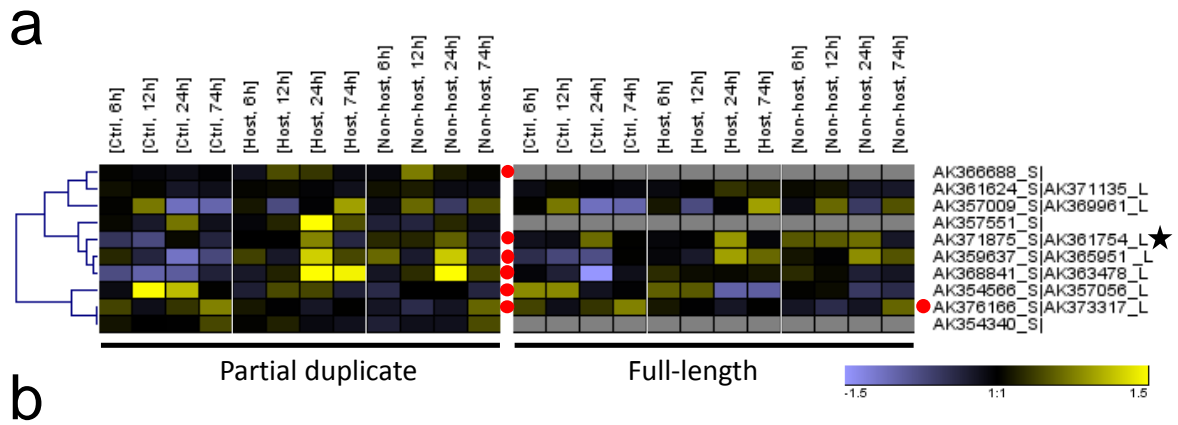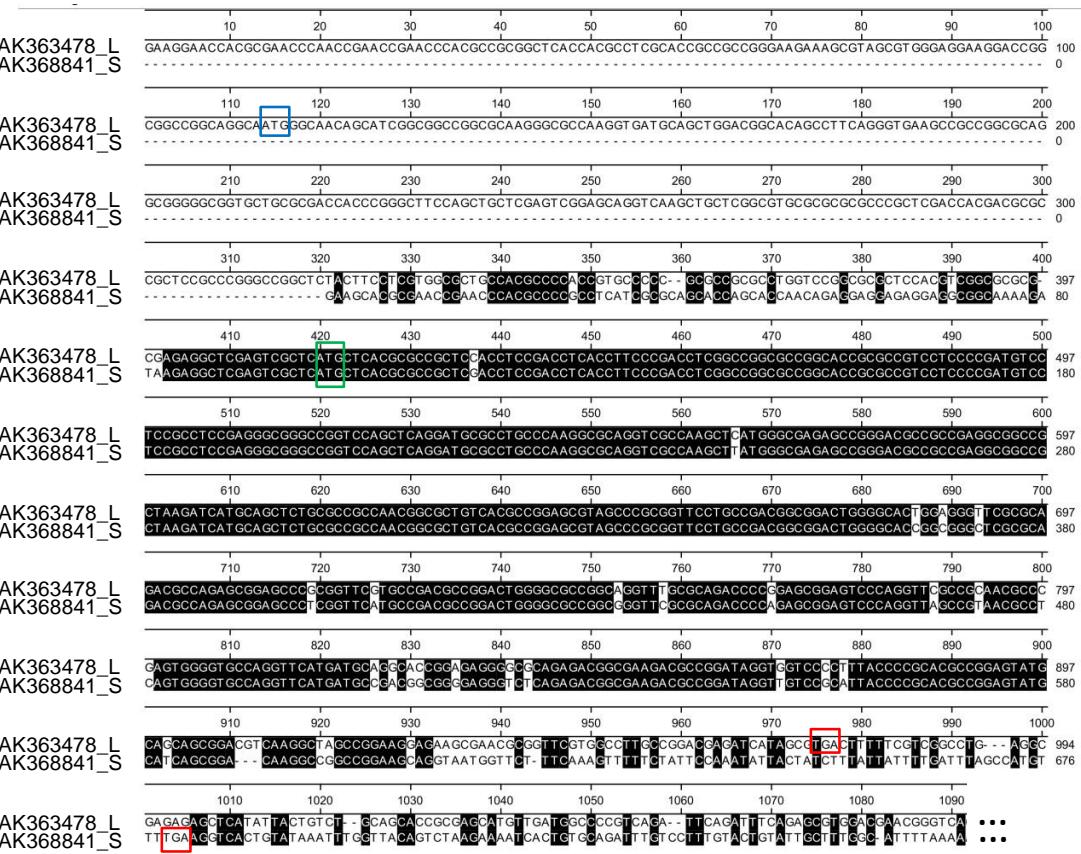

**Figure 8:** Genome-wide search for expressed, partial gene duplicates.



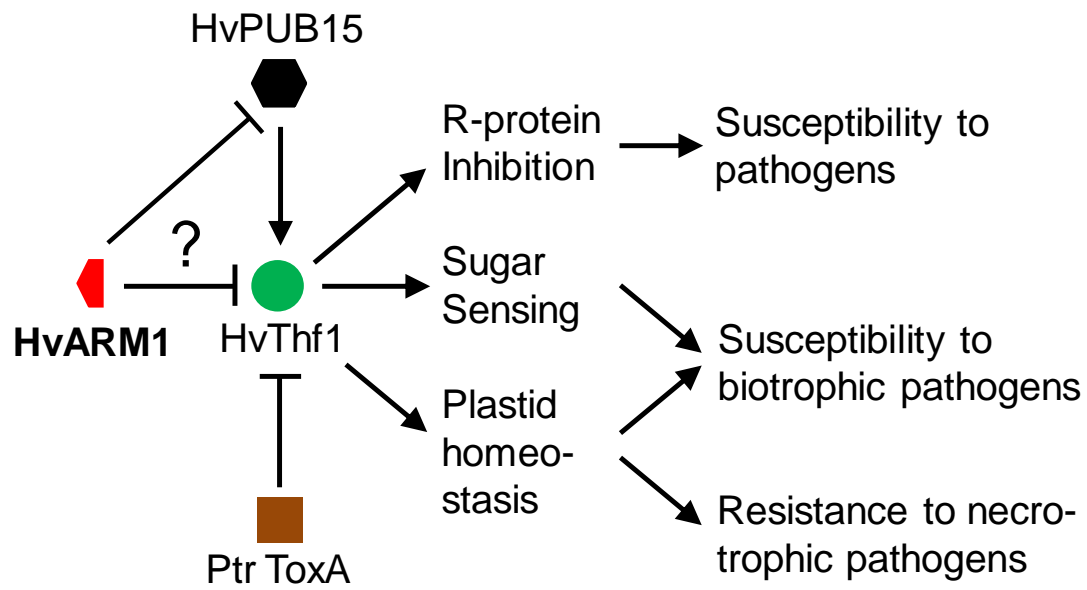

**Figure 9:** Model of the HvThf1-related functions of HvARM1 and HvPUB15.

## SUPPORTING INFORMATION

**Figure S1:** Alignment of *HvPUB15* and *HvARM1* genomic sequences.

**Figure S2:** Protein alignment of HvARM1 to HvPUB15.

**Figure S3:** Off-target prediction in transgenic barley carrying the RNAi hairpin construct pIPKb009 for silencing of *HvARM1*.

**Figure S4:** Expression of *HvARM1* endogenous transcripts in powdery mildew-attacked barley epidermis.

**Figure S5:** Localization of YFP-tagged proteins in barley epidermal cells.

**Figure S6:** In vitro ubiquitin ligase activity of HvPUB15.

**Figure S7:** Additional controls for BiFC in *N. bentaminiana* leaves.

**Figure S8:** Quantification of BiFC signals in *N. benaminiana* leaves.

**Figure S9:** Additional, array-based transcript regulation data of selected genes in powdery mildew-attacked barley leaves.

**Figure S10:** Plasmid map of pIPKTA48 for the subcellular localization of N-terminal fusion proteins with YFP.

**Figure S11:** Plasmid map of pIPKTA49 for the subcellular localization of C-terminal fusion proteins with YFP.

**Table S1:** Passport data of the plant accessions used for association genetic analysis.

**Table S2:** SNP calls and derived gene haplotypes based on Exome Capture re-sequencing of the barley genome.

**Table S3:** Interacting candidates from yeast-2-hybrid screening.

**Table S4:** Genome-wide search for pairs of partially duplicated genes.

**Table S5:** Primary signal intensity data from GeneSpring analysis of Agilent 44K Gene Expression array of two selected transcripts shown in supporting Figure S9.

**Table S6:** PCR and TaqMan primers used in the study.

**Methods S1:** More detailed description of Materials and Methods used for the study.
